1 **Title:** Minian an Open-source Miniscope Analysis Pipeline

2 **Authors:** Zhe Dong<sup>1</sup>, William Mau<sup>1</sup>, Yu Feng<sup>1</sup>, Zachary T. Pennington<sup>1</sup>, Lingxuan Chen<sup>1</sup>, Yosif  
3 Zaki<sup>1</sup>, Kanaka Rajan<sup>1</sup>, Tristan Shuman<sup>1</sup>, Daniel Aharoni<sup>\*2</sup>, Denise J. Cai<sup>\*1</sup>

4 <sup>\*</sup>Corresponding Authors

5 <sup>1</sup>Nash Family Department of Neuroscience, Icahn School of Medicine at Mount Sinai

6 <sup>2</sup>Department of Neurology, David Geffen School of Medicine, University of California, Los  
7 Angeles

8

## 9 Abstract

10 Miniature microscopes have gained considerable traction for *in vivo* calcium imaging in freely  
11 behaving animals. However, extracting calcium signals from raw videos is a computationally  
12 complex problem and remains a bottleneck for many researchers utilizing single-photon *in*  
13 *vivo* calcium imaging. Despite the existence of many powerful analysis packages designed to  
14 detect and extract calcium dynamics, most have either key parameters that are hard-coded or  
15 insufficient step-by-step guidance and validations to help the users choose the best parameters.  
16 This makes it difficult to know whether the output is reliable and meets the assumptions  
17 necessary for proper analysis. Moreover, large memory demand is often a constraint for setting  
18 up these pipelines since it limits the choice of hardware to specialized computers. Given these  
19 difficulties, there is a need for a low memory demand, user-friendly tool offering interactive  
20 visualizations of how altering parameters at each step of the analysis affects data output. Our  
21 open-source analysis pipeline, Minian (Miniscope Analysis), facilitates the transparency and  
22 accessibility of single-photon calcium imaging analysis, permitting users with little computational  
23 experience to extract the location of cells and their corresponding calcium traces and  
24 deconvolved neural activities. Minian contains interactive visualization tools for every step of the  
25 analysis, as well as detailed documentation and tips on parameter exploration. Furthermore,  
26 Minian has relatively small memory demands and can be run on a laptop, making it available to  
27 labs that do not have access to specialized computational hardware. Minian has been validated  
28 to reliably and robustly extract calcium events across different brain regions and from different  
29 cell types. In practice, Minian provides an open-source calcium imaging analysis pipeline with  
30 user-friendly interactive visualizations to explore parameters and validate results.

## 31 Introduction

### 32 *Overview of related works*

33 Open-source projects—hardware, software, training curricula—have changed science and  
34 enabled significant advances across multiple disciplines. Neuroscience, in particular, has  
35 benefitted tremendously from the open-source movement. Numerous open-source projects  
36 have emerged [1,2], including various types of behavioral apparatus facilitating the design of  
37 novel experiments [3,4,5,6,7], computational tools enabling the analysis of large scale datasets  
38 [8,9,10,11,12,13,14,15,16,17,18,19,20,21], and recording devices allowing access to large  
39 populations of neurons in the brain [22,23,24,25,26,27,28,29,30,31]. Miniature microscopy has  
40 been an area of particular importance for the open-source movement in neuroscience. To  
41 increase the usability, accessibility, and transparency of this remarkable technology originally  
42 developed by Schnitzer and colleagues [32,33], a number of labs innovated on top of the  
43 original versions with open-source versions [26,27,28,29,30,31]. The UCLA Miniscope project, a  
44 user-friendly miniature head-mounted microscope for *in vivo* calcium imaging in freely behaving  
45 animals, is one such project that has been accessible to a large number of users [22,34,35,36].

46 With the increasing popularity of miniature microscopes, there is a growing need for analysis  
47 pipelines that can reliably extract neuronal activities from recording data. To address this need,  
48 numerous algorithms have been developed and made available to the neuroscience community.  
49 The principal component analysis or independent component analysis (PCA-ICA)-based  
50 approach [13], and region-of-interest (ROI)-based approach [34] were among the earliest

51 algorithms that reliably detected the locations of neurons and extract their overall activities  
52 across pixels. However, one of the limitations of these approaches is that activities from cells  
53 that are spatially overlapping cannot be demixed. A subsequent constrained non-negative  
54 matrix factorization (CNMF) approach was shown to reliably extract neuronal activity from both  
55 two-photon and single-photon calcium imaging data [37], and demix the activities of overlapping  
56 cells. The CNMF algorithm models the video as a product of a ‘spatial’ matrix containing  
57 detected neuronal footprints (locations of cells) and a ‘temporal’ matrix containing the temporal  
58 calcium traces of each detected cell. This approach is particularly effective at addressing  
59 crosstalk between neurons, which is of particular concern in single-photon imaging, where the  
60 fluorescence from overlapping or nearby cells contaminates each other. Moreover, by  
61 deconvolving calcium traces, the CNMF algorithm enables a closer exploration of the underlying  
62 activity of interest, action potentials [19,38]. Originally developed for two-photon data, the CNMF  
63 algorithm did not include an explicit model of the out-of-focus fluorescence which is often  
64 present in single-photon miniature microscope recordings. This issue was addressed via the  
65 CNMF-E algorithm [11], where a ring-model is used as a background term to account for out-of-  
66 focus fluorescence. Later, an open-source python pipeline for calcium imaging analysis,  
67 CalmAn, was published, which included both the CNMF and CNMF-E algorithms, as well as  
68 many other functionalities [16]. The latest development in analysis pipelines for *in vivo* miniature  
69 microscope data is MIN1PIPE [12], where a morphological operation is used to  
70 remove background fluorescence during pre-processing of the data, and a seed-based  
71 approach is used for initialization of the CNMF algorithm. Other approaches have also been  
72 used to extract signals from calcium imaging data including an online approach [20],  $\ell_0$ -  
73 penalization approach to infer spikes [14,21], robust modeling of noise [39], and source  
74 detection using neural networks [15].

75 The open sharing of the algorithms necessary for the computation of neural activity has been  
76 exceptionally important for the field. However, implementation of these tools can be complex as  
77 many algorithms have numerous free parameters (those that must be set by the user) that can  
78 influence the outcomes, without clear guidance on how these parameters should be set or to  
79 what extent they affect results. Moreover, there is a lack of ground-truth data for *in*  
80 *vivo* miniature microscope imaging, making it hard to validate algorithms and/or parameters.  
81 Together, these obstacles make it challenging for neuroscience labs to adopt the analysis  
82 pipelines, since it is difficult for researchers to adjust parameters to fit their data, or to trust the  
83 output of the pipeline for downstream analysis. Thus, the next challenge in open-source  
84 analysis pipelines for calcium imaging is to make the analysis tools more user-friendly and  
85 underlying algorithms more accessible to neuroscience researchers so that they can more  
86 easily understand the pipeline and interpret the results.

### 87 *Contributions of Minian*

88 To increase the accessibility of the mathematical algorithms, transparency into how altering  
89 parameters alters the data output, and usability for researchers with limited computational  
90 resources and experience, we developed Minian, an open-source analysis pipeline for single-  
91 photon calcium imaging data inspired by previously published algorithms. We based Minian on  
92 the CNMF algorithm [16,37], but also leverage methods from other pipelines, including those  
93 originally published by Cai et al. [34] and MIN1PIPE [12]. To enhance compatibility with different  
94 types of hardware, especially laptops or personal desktop computers, we implemented an

95 approach that supports parallel and out-of-core computation (i.e., computation on data that are  
96 too large to fit a computer's memory). We then developed interactive visualizations for every  
97 step in Minian and integrated these steps into annotated Jupyter Notebooks as an interface for  
98 the pipeline. We have included detailed notes and discussions on how to adjust the parameters  
99 from within the notebook and have included all free parameters in the code for additional  
100 flexibility. The interactive visualizations will help users to intuitively understand and visually  
101 inspect the effect of each parameter, which we hope will facilitate more usability, transparency,  
102 and reliability in calcium imaging analysis.

103 Minian contributes to three key aspects of calcium image data analysis:

- 104 1. **Visualization.** For each step in the pipeline, Minian provides visualizations of inputs and  
105 results. Thus, users can proceed step-by-step with an understanding of how the data are  
106 transformed and processed. In addition, all visualizations are interactive and support  
107 simultaneous visualization of the results obtained with different parameters. This feature  
108 provides users with knowledge about the corresponding outcome for each parameter  
109 value, and allow the users to choose the outcome that fits best with their expectation.  
110 Hence, the visualizations also facilitate parameter exploration for each step, which is  
111 especially valuable when analyzing data from heterogeneous origins that may vary by brain  
112 region, cell type, species, and the extent of viral transfection.
- 113 2. **Memory demand.** One of the most significant barriers in adopting calcium imaging  
114 pipelines is the memory demand of algorithms. The recorded imaging data usually take up  
115 tens of gigabytes of space when converted to floating-point datatypes and often cannot fit  
116 into the RAM of standard computers without spatially and/or temporally down-sampling.  
117 CalmAn [16] addresses this issue by splitting the data into overlapping patches of pixels,  
118 processing each patch independently, and merging the results together. This enables out-  
119 of-core computation since at any given time only subsets of data are needed and loaded  
120 into memory. In Minian, we extend this concept further by flexibly splitting the data either  
121 spatially (split into patches of pixels) or temporally (split into chunks of frames). In this way,  
122 we avoid the need to merge the results based on overlapping parts. The result is a pipeline  
123 that supports out-of-core computation at each step, which gives nearly constant memory  
124 demand with respect to input data size. Minian can process more than 20min of recording  
125 (approximately 12.6 GB of raw data) with 8GB of memory, which makes Minian suitable to  
126 be deployed on modern personal laptops.
- 127 3. **Accessibility.** Minian is an open-source Python package. In addition to the codebase,  
128 Minian distributes several Jupyter Notebooks that integrate explanatory text with code and  
129 interactive visualizations of results. For each step in the notebook, detailed instructions, as  
130 well as intuition about the underlying mathematical formulation are provided, along with  
131 code, which can be directly executed from within the notebook. Upon running a piece of  
132 code within the notebook visualizations appear directly below. In this way, the notebooks  
133 serve as a complement to traditional API documentations of each function. In addition,  
134 users can easily rearrange and modify the pipeline notebook to suit their needs without  
135 diving into the codebase and modifying the underlying functions. The notebooks distributed  
136 by Minian can simultaneously function as a user guide, template, and production tool. We  
137 believe the inclusion of these notebooks, in combination with Minian's other unique

138 features, can increase understanding of the underlying functioning of the algorithms and  
139 greatly improve the accessibility of miniature microscopy analysis pipelines.

#### 140 *Paper organization*

141 The paper is organized as follows: Since Minian's major contribution is usability and  
142 accessibility, we first present the detailed steps in the analysis pipeline in Materials and  
143 Methods section. Following a step-by-step description of the algorithms Minian adopted from  
144 existing works, we present novel visualizations of the results, as well as how users can utilize  
145 these visualizations. In the Results section, we benchmark Minian across two brain regions and  
146 show that spatial footprints and the temporal activity of cells can be reliably extracted. We also  
147 show that the cells extracted by Minian in hippocampal CA1 exhibit stable spatial firing  
148 properties consistent with the existing literature.

#### 149 **Materials and Methods**

150 Here, we present a detailed description of Minian. We begin with an overview of the Minian  
151 pipeline. Then, we provide an explanation of each step, along with the visualizations. Lastly, we  
152 provide information regarding hardware and dependencies.

#### 153 *Overview of Minian*

154 Minian comprises five major stages, as shown in Figure 1. Raw videos are first passed into a  
155 pre-processing stage. During pre-processing, the background caused by vignetting (in which the  
156 central portion of the field of view is brighter) is corrected by subtracting a minimum projection of  
157 the movie across time. Sensor noise, evident as granular specks, is then corrected with a  
158 median filter. Finally, background fluorescence is corrected by the morphological process  
159 introduced in MIN1PIPE [12]. The pre-processed video is then motion-corrected with a standard  
160 template-matching algorithm based on cross-correlation between each frame and a reference  
161 frame [40]. The motion-corrected and pre-processed video then serves as the input to  
162 initialization and CNMF algorithms. The seed-based initialization procedure looks for local  
163 maxima in max projections of different subsets of frames and then generates an over-complete  
164 set of seeds, which are candidate pixels for detected neurons. Because this process is likely to  
165 produce many false positives, seeds are then further refined based on various metrics, including  
166 the amplitude of temporal fluctuations and the signal-to-noise ratio of temporal signals. The  
167 seeds are transformed into an initial estimation of cells' spatial footprints based on the  
168 correlation of neighboring pixels with each seed pixel, and the initial temporal traces are in turn  
169 estimated based on the weighted temporal signal of spatial footprints. Finally, the processed  
170 video, initial spatial matrix, and temporal matrix are fed into the CNMF algorithm. The CNMF  
171 algorithm first refines the spatial footprints of the cells (spatial update). The algorithm then  
172 denoises the temporal traces of each cell while simultaneously deconvolving the calcium trace  
173 into estimated 'spikes' (temporal update). CNMF spatial and temporal updates are performed  
174 iteratively and can be repeated until a satisfactory result is reached through visual inspection.  
175 Typically, this takes two cycles of spatial, followed by temporal, updates. Minian also includes a  
176 demo dataset which allows the user to run and test the pipeline comprised of the pre-made  
177 Jupyter Notebook immediately after installation.

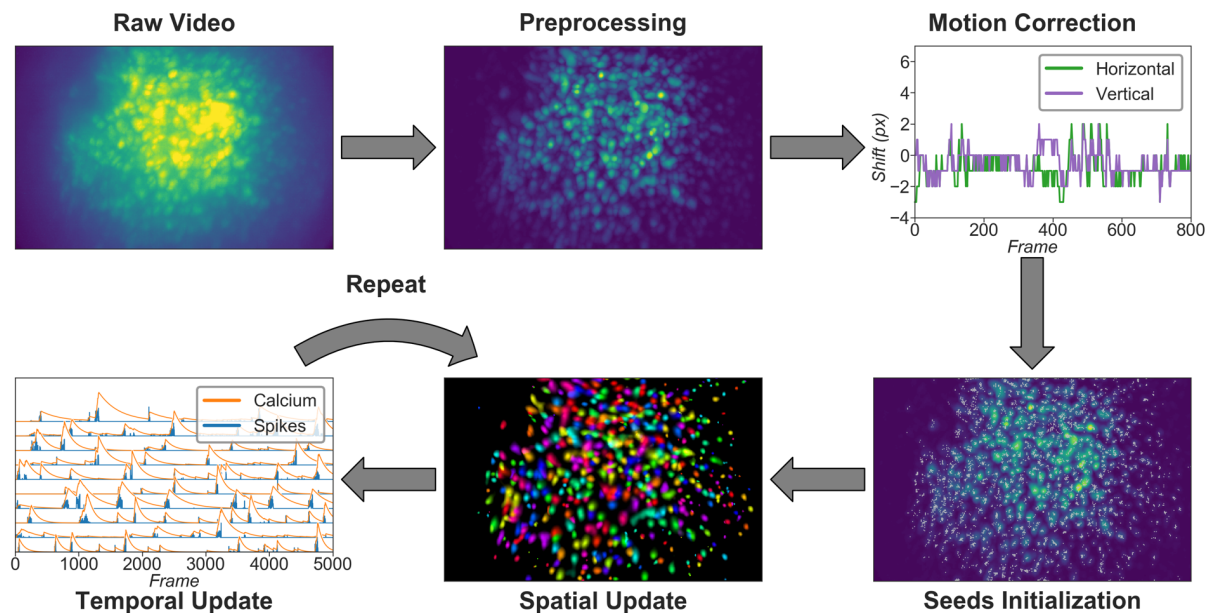

178

179 **Figure 1: Overview of the analysis pipeline.** The analysis is divided into five stages: Pre-  
180 preprocessing, where sensor noise and background fluorescence from scattered light are removed;  
181 Motion-correction, where rigid motion of the brain is corrected; Seeds-initialization, where the  
182 initial spatial and temporal matrices for later steps are generated from a seed-based approach;  
183 Spatial update, where the spatial footprints of cells are further refined; Temporal update, where  
184 the temporal signals of cells are further refined. The last two steps of the pipeline are iterative  
185 and can be repeated multiple times until a satisfactory result is reached.

186 **Setting up**

187 The first section in the pipeline includes house-keeping scripts to import packages and  
188 functions, defining parameters, and setting up parallel computation and visualization. Most  
189 notably, the distributed cluster that carries out all computations in Minian are set up in this  
190 section. By default, the cluster runs locally with multi-core CPUs, however it can be easily  
191 scaled up to run on distributed computers. The computation in Minian is optimized such that in  
192 most cases the memory demand for each process/core can be as low as 2GB. However, in  
193 some cases depending on the hardware, the state of operating system and data locality, Minian  
194 might need more than 2GB per process to run. If a memory error (KilledWorker) is encountered,  
195 it is common for users to increase the memory limit of the distributed cluster to get around the  
196 error. Regardless of the exact memory limit per process, the total memory usage of Minian  
197 roughly scales linearly with the number of parallel processes. The number of parallel processes  
198 and memory usage of Minian are completely limited and managed by the cluster configuration  
199 allowing users to easily change them to suit their needs.

200 *Pre-processing*

201 Loading data and down-sampling

202 Currently Minian supports .avi movies, the default output from the UCLA Miniscopes, and .tif  
203 stacks, the default output from Inscopix miniscopes. This functionality can be easily extended to  
204 support more formats if desired. Users are required to organize their data so that each recording  
205 session is contained in a single folder. Because Minian can extract relevant metadata from  
206 folder nomenclature (e.g., animal name, group, date), we suggest organizing the video folders  
207 based upon animal and other experiment-related groupings to facilitate the incorporation of  
208 metadata into Minian output files.

209 Minian supports down-sampling on any of the three video dimensions (height, width, and  
210 frames). Two down-sampling strategies are currently implemented: either sub-setting data on a  
211 regular interval or calculating a mean for each interval. At this stage, users are required to  
212 specify (1) the path to their data, (2) a pattern of file names to match all the videos to be  
213 processed (e.g., all files containing 'msCam', a typical pattern resulting from Miniscope  
214 recordings), (3) a Python dictionary specifying whether and how metadata should be pulled from  
215 folder names, (4) another Python dictionary specifying whether and on which dimension down-  
216 sampling should be carried out, and (5) the down-sampling strategy, if desired.

217 Once specified, the data can be immediately visualized through an interactive viewer, as shown  
218 in Figure 2. Along with a player to visualize every frame in the video, the viewer also plots  
219 summary values such as mean, maximum, or minimum fluorescence values across time. This  
220 helps users to check their input data and potentially exclude any artifacts caused by technical  
221 faults during experiments (e.g., dropped frames). Users can further subset data to exclude  
222 specified frames, if necessary. Finally, restricting the analysis to a certain sub-region of the field  
223 of view during specific steps could be beneficial. For example, if the video contains anchoring  
224 artifacts resulting from dirt on the lenses, it is often better to avoid such regions during motion  
225 correction. To facilitate this, the viewer provides a feature where users can draw an arbitrary  
226 box within the field of view and have it recorded as a mask. This mask can be passed into later  
227 motion correction steps to avoid the biases resulting from the artifacts.

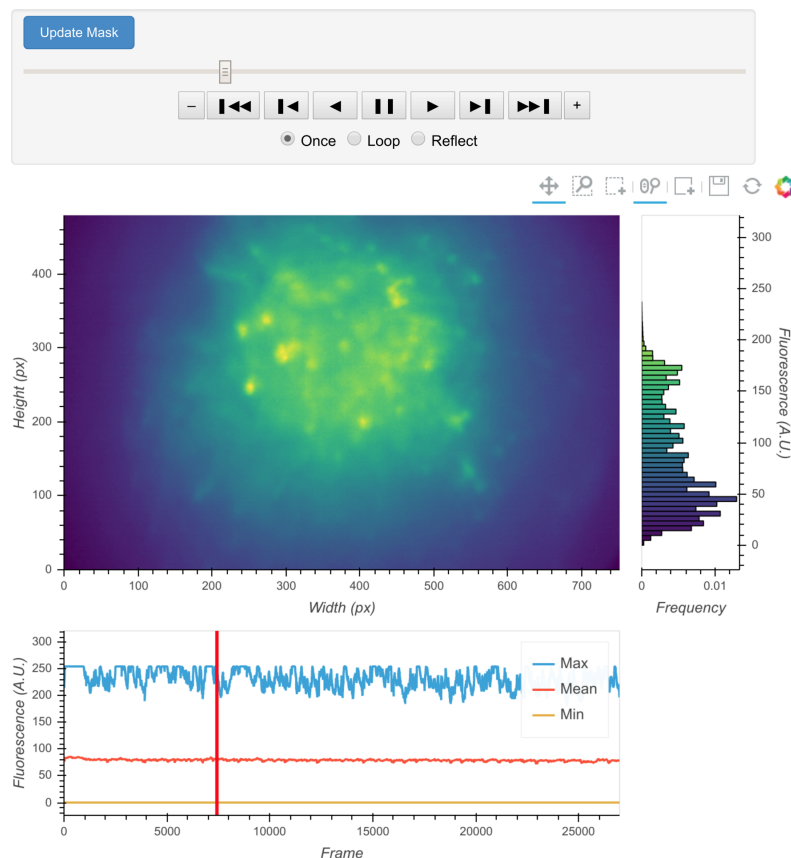

228

229 **Figure 2: Interactive visualization of raw input video.** One frame is shown in the central panel  
230 of the visualization which can be interactively updated with the player toolbar on the top. A  
231 histogram of fluorescence intensity of the current frame is shown on the right and will update in  
232 response to zooming in on the central frame. A line plot of summary values across time is  
233 shown on the bottom. Here the maximum, mean, and minimum fluorescence values are plotted.  
234 These summaries are useful in checking whether there are unexpected artifacts or gaps in the  
235 recording. Finally, the user can draw an arbitrary box in the central frame, and the position of  
236 this boxed region can be recorded and used as a mask during later steps. For example, during  
237 motion correction a sub-region of the data containing a stable landmark might provide better  
238 information on the motion.

239 Vignetting correction

240 Single-photon miniature microscope data often suffer from a vignetting effect in which the  
241 central portion of the field of view appears brighter than the periphery. Vignetting is deleterious  
242 to subsequent processing steps and should be removed. We find that the effect can be easily  
243 extracted by taking the minimum fluorescence value across time for each pixel and subtracting  
244 this value from each frame, pixel-wise. One of the additional benefits of subtracting the  
245 minimum is that it preserves the raw video's linear scale.

246 The result of this step can be visualized with the same video viewer used in the previous step.  
247 In addition to visualizing a single video, the viewer can also show multiple videos side-by-side  
248 (e.g., the original video and the processed video), as shown in Figure 3. The



249 operation/visualization is carried out 'on-the-fly' upon request for each frame, and users do not  
250 have to wait for the operation to finish on the whole video to view the results.

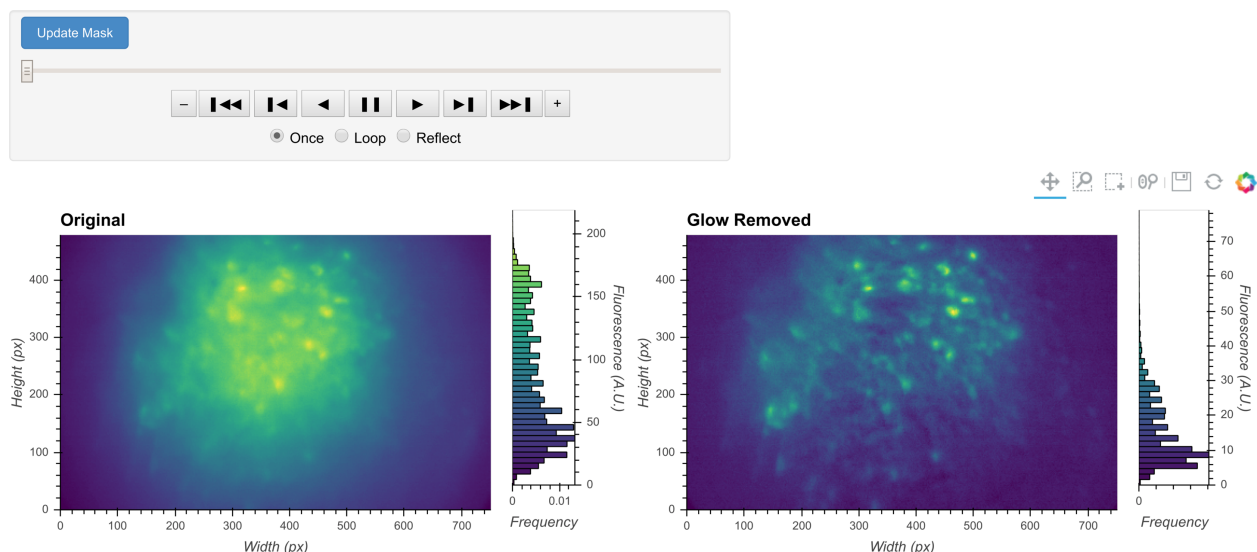

251  
252 **Figure 3: General visualization of pre-processing.** The same visualization of input video can  
253 be used to visualize the whole video before and after specific pre-processing steps side-by-side.  
254 The effect of vignetting correction is visualized here. The image and accompanying histogram  
255 on the left side show the original data; the data after vignetting correction are shown on the right  
256 side. Any frame of the data can be selected with the player toolbar and histograms are  
257 responsive to all updates in the image.

## 258 Denoising

259 Next, we correct for salt-and-pepper noise on each frame, which usually results from electronic  
260 pixel noise. By default, we pass each frame through a median filter, which is generally  
261 considered particularly effective at eliminating this type of noise, though other smoothing filters  
262 like Gaussian filters and anisotropic filters can also be implemented. The critical parameter here  
263 is the window size of the median filter. A window size that is too small will make the filter  
264 ineffective at correcting outliers, while a window size that is too large will remove finer gradient  
265 and edges that are much smaller than the window size, and can result in a failure to distinguish  
266 between adjacent cells.

267 The effect of the window size can be checked with an interactive visualization tool used across  
268 the pre-processing stage, as shown in Figure 4. Additionally, here we show an example of the  
269 effect of window size on the resulting data in Figure 5. Users should see significantly reduced  
270 amount of salt-and-pepper noise in the images, which should be made more obvious by the  
271 contour plots. At the same time, users should keep the window size below the extent where  
272 over-smoothing occurs. As a heuristic, the average cell radius in pixel units works well, since a  
273 window of the same size as an average cell is unlikely to blend different cells together, while still  
274 being able to adequately smooth the image.

method: median, ksize: 7

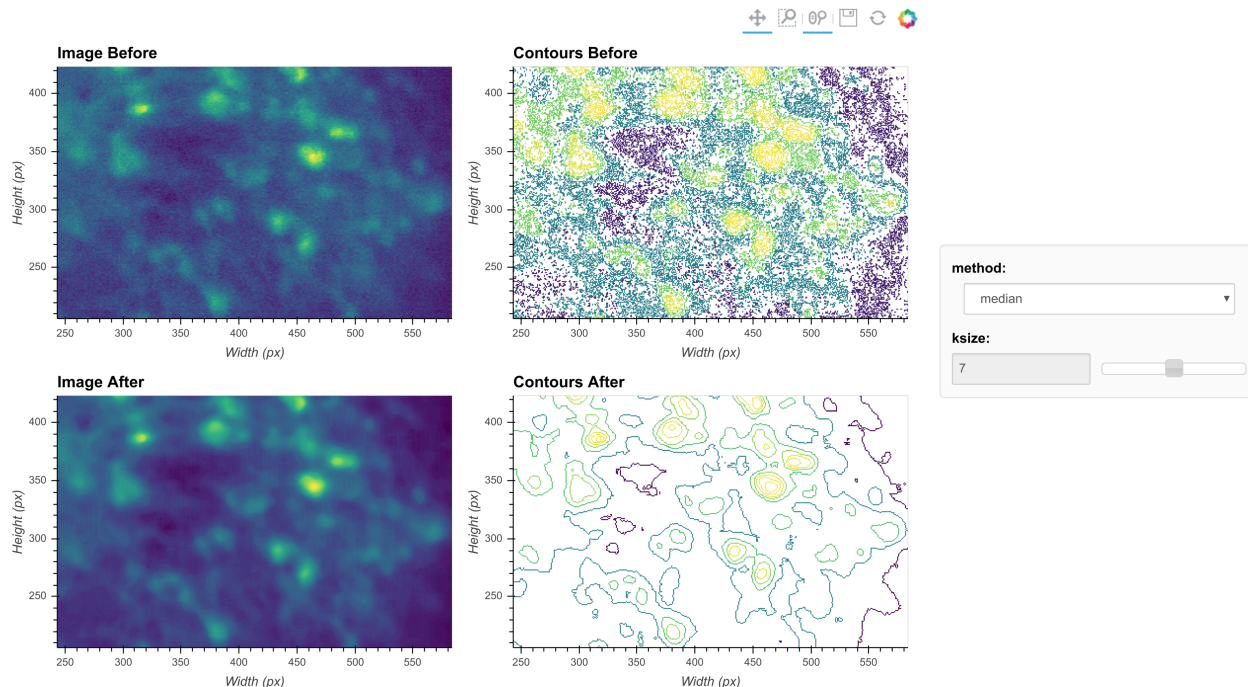

275

276 **Figure 4: Visualization of denoising.** Here, a single frame from the data is passed through the  
277 background removal and both the image and a contour plot are shown for the frame before and  
278 after the process. The contour plots show the iso-contour of 5 intensity levels spaced linearly  
279 across the full intensity range of the corresponding image. The plots are interactive and  
280 responsive to the slider of the window size on the right, thus the effect of different window sizes  
281 for denoising can be visualized.

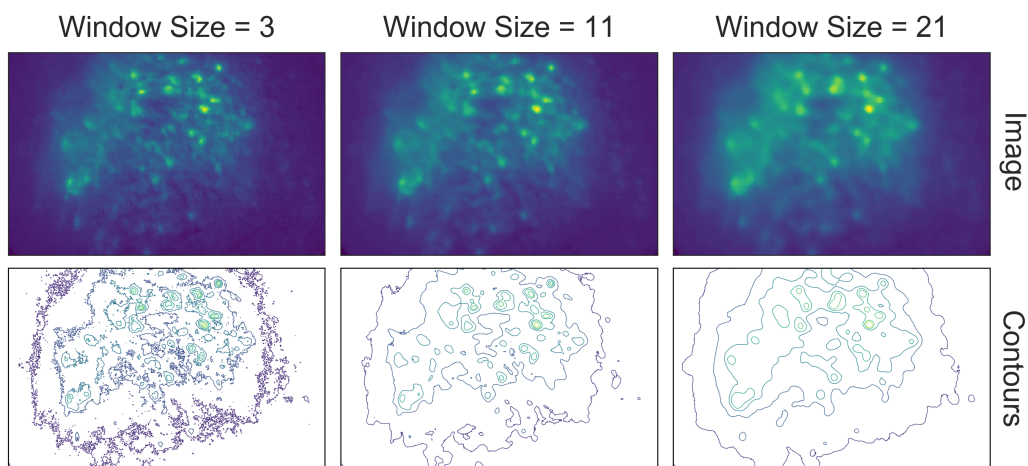

282

283 **Figure 5: Effect of window size on denoising.** One example frame is chosen from the data,  
284 and the resulting images (top row) and contour plots (bottom row) are shown to demonstrate the  
285 effect of window size on denoising. Here, a window size of 11 (middle column) is appropriate  
286 while both smaller and larger window sizes result in artifacts.

## 287 Morphological background removal

288 Next, we remove any remaining background presumably caused by out-of-focus and tissue  
289 fluorescence. To accomplish this we estimate the background using a morphological opening  
290 process first introduced for calcium imaging analysis in MIN1PIPE [12], which acts as a size  
291 filter that removes cell bodies. The morphological opening is composed of two stages: erosion  
292 followed by dilation. In morphological erosion the image is passed through a filter where each  
293 pixel will be substituted by the minimum value within the filter window. The effect of this process  
294 is that any bright 'feature' that is smaller than the filter window will be 'eroded' away. Then the  
295 dilation process accomplishes the reverse by substituting each pixel with the maximum value in  
296 the window, which 'dilates' small bright features to the extent of the filter window size. The  
297 combined effect of these two stages is that any bright 'feature' that is smaller than the filter  
298 window is removed from the image. If we choose the window size to match the expected cell  
299 diameter, performing a morphological opening will likely remove cells and provide a good  
300 estimation of background. Hence, each frame is passed through the morphological opening  
301 operation and the resulting image is subtracted from the original frame.

302 Although the window size parameter for the morphological opening can be pre-determined by  
303 the expected cell diameter, it is helpful to visually inspect the effect of morphological  
304 background removal. The effect of different window sizes can be visualized with the same tool  
305 used in denoising, as shown in Figure 6. Additionally, here we show an example of the effect of  
306 window size on the resulting data in Figure 7. In this case, a window size of 20 pixels is  
307 considered appropriate because the resulting cells are appropriately sized and sharply defined.  
308 In contrast, a smaller window results in limiting both the size and intensity of the cells. On the  
309 other hand, residual out-of-focus fluorescence becomes visible when the window size is set too  
310 large.

method: tophat, wnd: 15

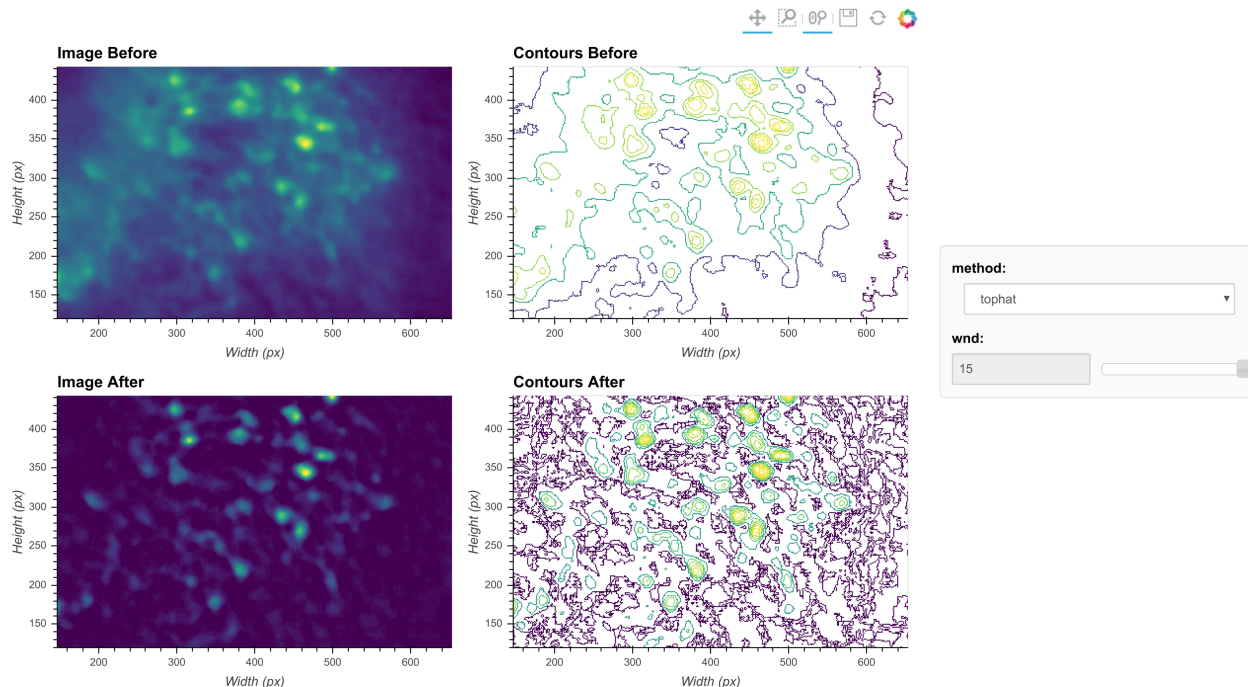

311  
312 **Figure 6: Visualization of background removal.** Here, a single frame from the data is passed  
313 through background removal and both the image and a contour plot are shown for the frame  
314 before and after the process. The plots are interactive and responsive to the slider of the  
315 window size on the right, thus the effect of different window sizes for background removal can  
316 be visualized.

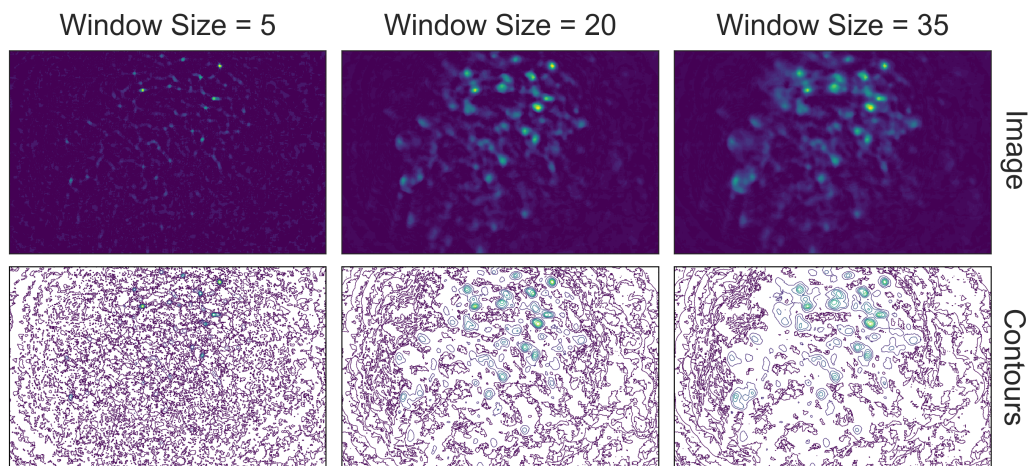

317  
318 **Figure 7: Effect of window size on background removal.** One example frame is chosen from  
319 the data, and the resulting images (top row) and contour plots (bottom row) are shown to  
320 demonstrate the effect of window size on background removal. The contour plots show the iso-  
321 contour of 5 intensity levels spaced linearly across the full intensity range of the corresponding  
322 image. Here a window size of 20 pixels (middle column) is appropriate while both smaller and  
323 larger window sizes produce unsatisfactory results: a window size too small (left column)

324 *artificially limits the size of cells, and a window size too large (right column) does not remove the*  
325 *background effectively.*

326 *Motion correction*

327 Estimate and apply translational shifts

328 We use a standard template-matching algorithm based on cross-correlation to estimate and  
329 correct for translational shifts [40]. In practice, we found that this approach is sufficient to correct  
330 for motion artifacts that could have a significant impact on the final outcome. Briefly, for a range  
331 of possible shifts, a cross-correlation between each frame and a template frame is calculated.  
332 The shift producing the largest cross-correlation is estimated to reflect the degree of movement  
333 from the template and is corrected by applying a shift to the frame in that direction. We apply  
334 this operation to the whole movie in a divide-and-conquer manner. We split the movie into  
335 chunks of frames, within which we register both the first and last frame to the middle frame. We  
336 then take the max projections of the three frames that have been registered in each chunk and  
337 group every 3 chunks together and register them using the max projections as templates. After  
338 the registration, the 3 chunks that have been registered are treated as a new single chunk and  
339 we again take the max projection to use as a template for further registration. In this way, the  
340 number of frames registered in each chunk keeps increasing in powers of three (3, 9, 27, 81  
341 etc.), and we repeat this process recursively until all the frames are covered in a single chunk  
342 and the whole movie is registered. Since the motion correction is usually carried out after  
343 background removal, we essentially use cellular activity as landmarks for registration.  
344 Sometimes this can be problematic when cellular activity is very sparse and different across two  
345 chunks (for example, when only two different cells fired in two chunks), leading to false  
346 estimation of shifts. To overcome this problem, every time shift is estimated using a max  
347 projection from two chunks, we also estimate a shift with the two consecutive frames bordering  
348 the chunks (that is, the last frame from the earlier chunk and the first frame from the latter  
349 chunk). In most cases the shifts estimated with these two sets of templates should be close, in  
350 which case we use the shifts estimated with the max projection as the final output. However,  
351 when the two estimated shifts differ too much from each other, we use the shifts estimated with  
352 consecutive frames as the final output. The reason we still favor using max projections in most  
353 cases is that registering with consecutive frames can lead to very fast accumulation of error and  
354 a slow drifting artifact in the estimated shifts. In practice, we find that such a process can  
355 account for almost all motion in the brain, so currently we only implemented estimation of  
356 translational shifts. If the user would like to take advantage of anatomical landmarks (such as  
357 blood vessels) within the field of view and would like to implement motion correction before all  
358 background subtraction steps have been performed, the pipeline can be easily modified to do  
359 so. After the estimation of shifts, the shift in each direction is plotted across time and  
360 visualization of the data before and after motion correction is displayed in Minian (see Figure 1,  
361 top right).

## 362 *Seed initialization*

### 363 Generation of an over-complete set of seeds

364 The CNMF algorithm is a powerful approach to extract cells' spatial structure and corresponding  
365 temporal activity. However, the algorithm requires an initial estimate of cell locations/activity,  
366 which it then refines. We use a seed-based approach introduced in MIN1PIPE [12] to initialize  
367 spatial and temporal matrices for CNMF. The first step is to generate an over-complete set of  
368 seeds, representing the potential centroids of cells. We iteratively select a subset of frames,  
369 compute a maximum projection for these frames, and find the local maxima on the projections.  
370 This workflow is repeated multiple times and we take the union of all local maxima across  
371 repetitions to obtain an over-complete set of seeds. In this way, we avoid missing cells that only  
372 fire in short periods of time that might be masked by taking a maximum projection across the  
373 whole video.

374 During seed initialization, the first critical parameter is the spatial window for defining local  
375 maxima. Intuitively, this should be the expected diameter of cells. The other critical parameter is  
376 an intensity threshold for a local maximum to be considered a seed. Since the spatial window  
377 for local maxima is small relative to the field of view, a significant number of local maxima are  
378 usually false positives and do not actually reflect the location of cells. Thresholding the  
379 fluorescence intensity provides a simple way to filter out false local maxima, and usually a very  
380 low value is enough to produce satisfactory results. We have found a value of 3 usually works  
381 well (recall that the range of fluorescence intensity is usually 0-255 for unsigned 8-bit data). An  
382 alternative strategy to thresholding the intensity is to model the distribution of fluorescence  
383 fluctuations and keep the seeds with relatively higher fluctuations. This process is described  
384 in Seeds refinement with a Gaussian-Mixture-Model, and is accessible if the user prefers explicit  
385 modeling over thresholding.

386 Finally, the temporal sampling of frames for the maximum projections also impacts the result.  
387 We provide two implementations here: either taking a rolling window of frames across time, or  
388 randomly sampling frames for a user-defined number of iterations. For the rolling window  
389 approach, users can specify a temporal window size (the number of successive frames for each  
390 subset) and a step size (the interval between the start of subsets). For the random approach,  
391 users can specify the number of frames in each subset and the total number of repetitions. We  
392 use the rolling window approach as the default.

393 The resulting seeds are visualized on top of a maximum projection image (plot not shown).  
394 Although the spatial window size of local maxima can be pre-determined, the parameters for  
395 either the rolling window or random sampling of frames are hard to estimate intuitively. We  
396 provide default parameters that generally provide robust results. However, the user is also free  
397 to vary these parameters to obtain reasonable seeds. As long as the resulting seeds are not too  
398 dense (populating almost every pixel) or too sparse (missing cells that are visible in the max  
399 projection), subsequent steps can be performed efficiently and are fairly tolerable to the specific  
400 ways the seeds are initialized.

## 401 Refinement with peak-to-noise ratio

402 Next, we refine the seeds by looking at what we call the peak-to-noise ratio of the temporal  
403 traces and discard seeds with low peak-to-noise ratios. To compute this ratio, we first separate  
404 the noise from the presumed real signal. Calcium dynamics are mainly composed of low  
405 frequency fluctuations (from the slow kinetics of the calcium fluctuations) while noise is  
406 composed of higher frequency fluctuations. Thus, to separate the noise from the calcium  
407 dynamics we pass the fluorescence time trace of each seed through a low-pass and a high-  
408 pass filter to obtain the 'signal' and 'noise' of each seed. We then compute the difference  
409 between the maximum and minimum values (or peak-to-peak values) for both 'signal' and  
410 'noise', and the ratio between the two difference values defines the peak-to-noise ratio. Finally,  
411 we filter out seeds whose peak-to-noise value falls below a user-defined threshold.

412 The first critical parameter here is the cut-off frequency that separates 'signal' from 'noise'. This  
413 parameter is also important for subsequent steps when implementing the CNMF algorithm. We  
414 provide a visualization tool, shown in Figure 8, to help users determine cut-off frequency. In the  
415 visualization, 6 seeds are randomly selected, and their corresponding 'signal' and 'noise' traces  
416 are plotted. The user is then able to use a dynamic slider on the right side of the plots to adjust  
417 the cut-off frequency and view the results. The goal is to select a frequency that best separates  
418 signal from noise. A cut-off frequency that is too low will leave true calcium dynamics absorbed  
419 in 'noise' (left panel in Figure 9), while a frequency that is too high will let 'noise' bleed into  
420 'signal' (right panel in Figure 9). A suitable frequency is therefore the one where the 'signal'  
421 captures all of the characteristics of the calcium indicator dynamics (i.e., large, fast rise, and  
422 slow decay), while the 'noise' trace remains relatively uniform across time (middle panel in  
423 Figure 9). The interactive plots make this easy to visualize. We also provide an example in  
424 Figure 9 to show how cut-off frequency influences the separation of 'signal' from 'noise'. The  
425 second parameter is the threshold of peak-to-noise ratio value. In practice, we have found a  
426 threshold of 1 works well in most cases. An additional advantage of using 1 is that it reflects the  
427 intuitive interpretation that fluctuations in a real 'signal' should be larger than fluctuations in  
428 'noise'.

noise\_freq: 0.06

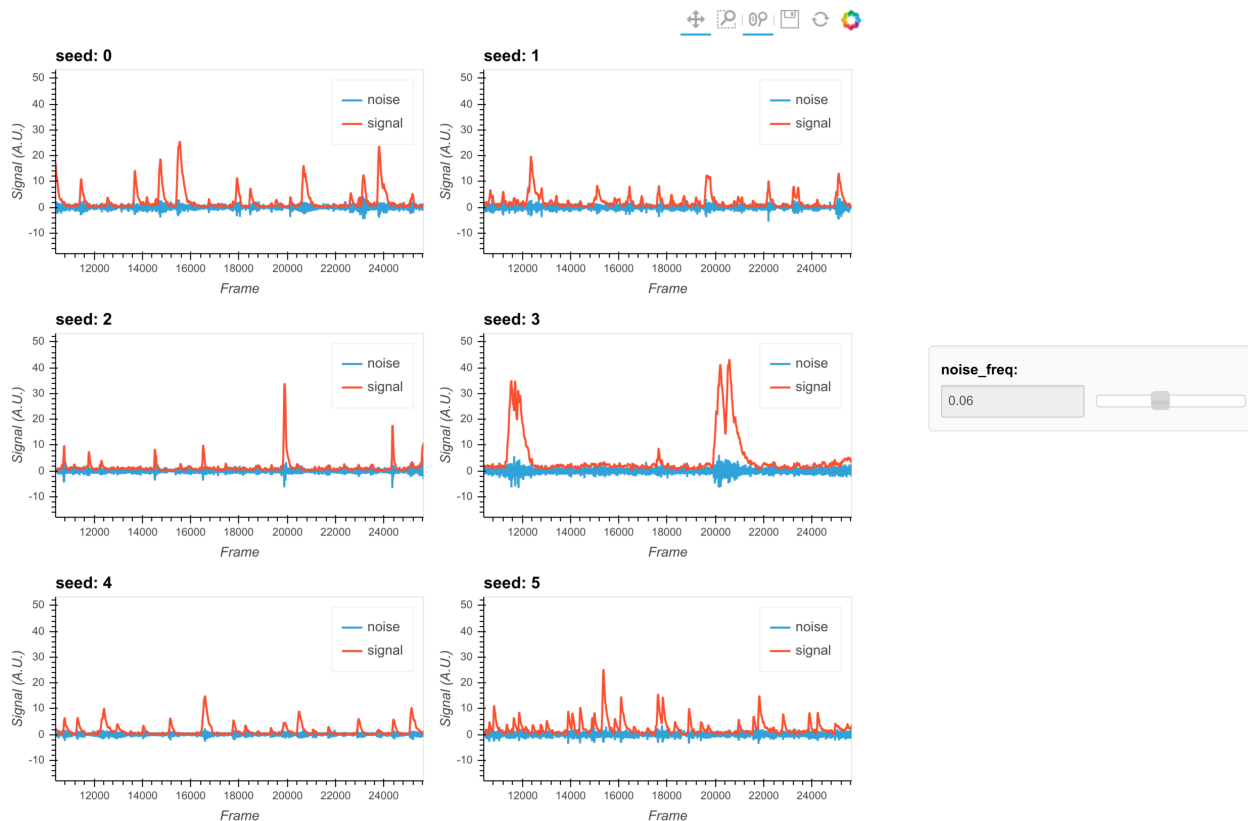

429

430 **Figure 8: Visualization of noise frequency cut-off.** The cut-off frequency for noise is one of  
431 the critical parameters in the pipeline that affects both the seed initialization process and  
432 CNMF's temporal update steps. Here we help the user determine that parameter by plotting  
433 temporal traces from six example seeds. In each plot the raw signal is passed through a high-  
434 pass and low-pass filter at the chosen frequency, and the resulting signals are plotted  
435 separately as "noise" and "signal". The plots are responsive to the chosen frequency controlled  
436 by the slider on the right. In this way, the user can visually inspect whether the chosen  
437 frequency can effectively filter out high frequency noise without deforming the calcium signal.



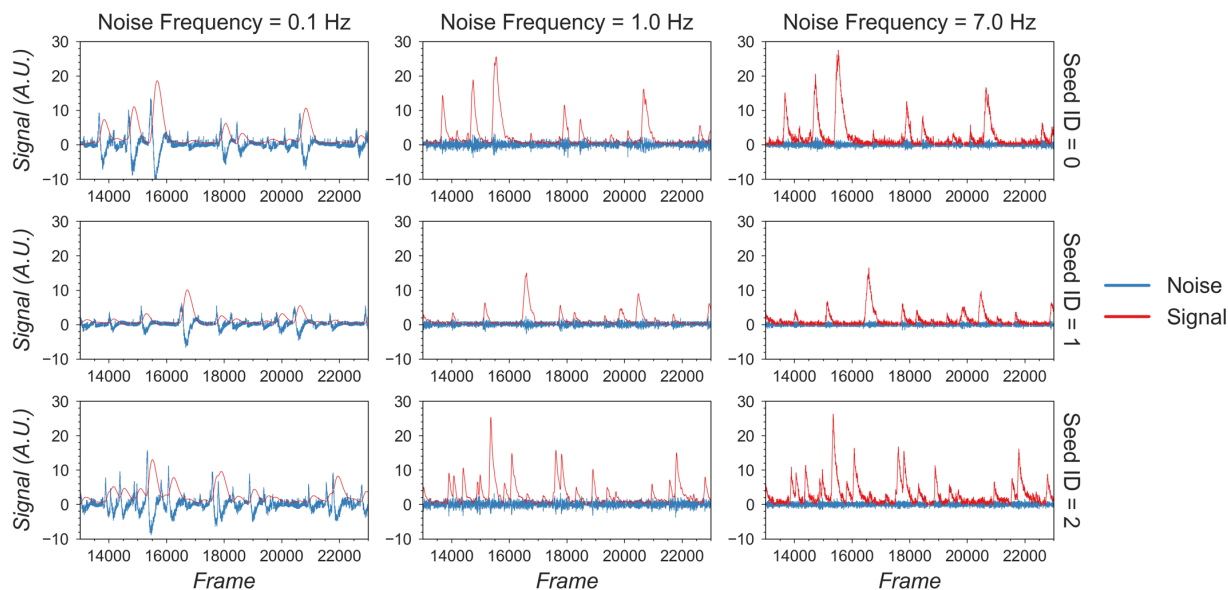

438

439 **Figure 9: Example of filtered traces with different frequency cut-offs.** Here the temporal  
440 dynamics of three example seeds are chosen, and the low-pass and high-pass filtered traces  
441 with different frequency cut-offs are shown. The low-pass filtered trace corresponds to 'signal',  
442 while the high-pass filtered trace corresponds to 'noise'. Here a 1 Hz cut-off frequency is  
443 considered appropriate, since calcium dynamics and random noise are cleanly separated. A  
444 cut-off frequency smaller than 1 Hz left the calcium dynamics in the 'noise' trace, while a cut-off  
445 frequency larger than 1 Hz let random noise bleed into the 'signal' trace (i.e., high frequency  
446 fluctuations are presented in periods where the cells seem to be inactive).

447 Refinement with Kolmogorov-Smirnov tests

448 Finally, we refine the seeds with a Kolmogorov-Smirnov test. The Kolmogorov-Smirnov test  
449 assesses the equality of two distributions and can be used to check whether the fluctuation of  
450 values for each seed is non-normally distributed. We expect the noisy fluorescence values when  
451 a cell is not firing to form a gaussian distribution with small mean value, and the fluorescence  
452 values when a cell is firing should have a much higher mean value and frequency than expected  
453 by the null gaussian distribution. Therefore, seeds corresponding to cells should be non-  
454 normally distributed. We use a default significance threshold of 0.05. In some cases, this might  
455 be too conservative or too liberal. Users can tweak this threshold or skip this step altogether  
456 depending on the resulting seeds.

457 Merge seeds

458 There will usually be multiple seeds for a single cell and it is best to merge them whenever  
459 possible. We implement two criteria for merging seeds: first, the distance between the seeds  
460 must be below a given threshold, and second, the correlation coefficient of the temporal traces  
461 between seeds must be higher than a given threshold. To avoid bias in the correlation due to  
462 noise, we implement a smoothing operation on the traces before calculating the correlation. The  
463 critical parameters are the distance threshold, the correlation threshold, and the cut-off

464 frequency for the smoothing operation. While the distance threshold is arbitrary and should be  
465 explored, often the average radius of cells provides a good starting point. The cut-off frequency  
466 should be the same as that used during the peak-to-noise-ratio refinement described above,  
467 and the correlation should be relatively high (we typically use 0.8, but this can be refined by the  
468 user). The resulting merged seeds can be visualized on the max projection. Since the main  
469 purpose of this step is to alleviate computation demands for downstream steps, it is fine to have  
470 multiple seeds for a single visually distinct cell. However, users should make sure each of the  
471 visually distinct cells still has at least one corresponding seed after the merge.

472 Initialize spatial and temporal matrices from seeds

473 The last step before implementing CNMF is to initialize the spatial and temporal matrices for the  
474 CNMF algorithm from the seeds. These matrices are generated with one dimension  
475 representing each putative cell and the other representing each pixel or time, respectively. In  
476 other words, the spatial matrix represents the spatial footprint for each cell at each pixel location  
477 and the temporal matrix represents the temporal fluorescence value of each cell on each frame.  
478 We assume each seed is the center of a potential cell, and we first calculate the spatial footprint  
479 for each cell by taking the cosine similarity between the temporal trace of a seed and the pixels  
480 surrounding that seed. In other words, we generate the weights in the spatial footprint by  
481 computing how similar the temporal activities of each seed are to the surrounding pixels. Then,  
482 we generate the temporal activities for each potential cell by taking the input video and  
483 weighting the contribution of each pixel to the cell's temporal trace by the spatial footprint of the  
484 cell. The final products are a spatial matrix and a temporal matrix.

485 Besides the two matrices representing neuronal signals, there are two additional terms in the  
486 CNMF model that account for background fluorescence modeled as a spatial footprint for the  
487 background and a temporal trace of background activity. To estimate these terms, we subtract  
488 the matrix product of our spatial and temporal matrices, which represent cellular activities, from  
489 the input data. We take the mean projection of this remainder across time as an estimation of  
490 the spatial footprint of the background, and we take the mean fluorescence for each frame as  
491 the temporal trace of the background.

492 Users can tweak two parameters to improve the outcome and performance of this step: a  
493 threshold for cosine similarity and a spatial window identifying pixels on which to perform this  
494 computation. To keep the resulting spatial matrix sparse and keep irrelevant pixels from  
495 influencing the temporal traces of cells, we set a threshold for the cosine similarity of temporal  
496 traces compared to the seed, where pixels whose similarity value falls below this threshold will  
497 be set to zero in the spatial footprint of the cell. Cosine similarity is, in essence, a correlation  
498 (the scale is 0-1) and thresholds of 0.5 and higher work well in practice. Computing many pair-  
499 wise similarity measurements is computationally expensive, and it is unnecessary to compute  
500 the similarities between pixels that are far apart because they are unlikely to have originated  
501 from the same cell. We therefore set a window size to limit the number of pixel pairs to be  
502 considered. This size should be set large enough so that it does not limit the size of spatial  
503 footprints, but not unnecessarily large to the extent where it will impact performance. In practice,  
504 a window size equal to the maximum expected cell diameter is reasonable.

505 *CNMF*

506 Estimate spatial noise

507 *CNMF* requires that we first estimate the spatial noise over time for each pixel in the input video.  
508 The spatial noise of each pixel is simply the power of the high frequency signals in each pixel.  
509 The critical parameter here is again the cut-off frequency for ‘noise’, and users should employ  
510 the visualization tools as described above during peak-to-noise ratio refinement to determine  
511 this frequency (see Refinement with peak-to-noise ratio).

512 Spatial update

513 Next, we proceed to the spatial update of the *CNMF* algorithm. The original paper describing  
514 this algorithm [37] contains a detailed theoretical derivation of the model. Here, we provide only  
515 a conceptual overview of the process so that users can understand the effect of each  
516 parameter. The *CNMF* framework models the input video to be the product of the spatial and  
517 temporal matrices representing signals contributed by real cells, a background term, and  
518 random noise. In equation form, this is  $\mathbf{Y} = \mathbf{A}\mathbf{C} + \mathbf{B} + \mathbf{E}$ , where  $\mathbf{Y}$  represents the input video,  $\mathbf{A}$   
519 represents the spatial matrix containing the spatial footprints for all putative cells,  $\mathbf{C}$  represents  
520 the temporal matrix containing the calcium dynamics for all putative cells,  $\mathbf{B}$  represents the  
521 spatial-temporal fluctuation of background, and  $\mathbf{E}$  represents error or noise. Since the full  
522 problem of finding proper  $\mathbf{A}$  and  $\mathbf{C}$  matrices is hard (non-convex), we break down the full  
523 process into spatial update and temporal update steps, where iterative updates of  $\mathbf{A}$  and  $\mathbf{C}$  are  
524 carried out, respectively. Each iteration will improve on previous results and eventually converge  
525 on the best estimation.

526 During the spatial update, given an estimation of the temporal matrix and the background term,  
527 we seek to update the spatial matrix so that it best fits the input data, along with the  
528 corresponding temporal traces. To do so, we first subtract the background term from the input  
529 data so that the remainder is composed only of signals from cells and noise. Then, for each  
530 pixel, the algorithm attempts to find the weights for each cell’s spatial footprint that best  
531 reproduces the input data ( $\mathbf{Y}$ ) with the constraint that individual pixels should not weigh on too  
532 many cells (controlled through what is called a sparseness penalty). To reduce computational  
533 demand, we do this for each pixel independently and in parallel to improve performance, while  
534 retaining the ‘demixing’ power of the *CNMF* algorithm by updating the weights for all cells  
535 simultaneously. In the optimization process, the function to be minimized contains both  
536 a squared error term to assess error, and an  $\ell_1$ -norm term to promote sparsity [16]. The  
537 optimization process can be expressed formally as:

$$\begin{aligned} 538 \quad & \underset{\mathbf{A}, \mathbf{b}}{\text{minimize}} && \|\mathbf{Y}(p, :) - \mathbf{A}(p, :)\mathbf{C} - \mathbf{b}\mathbf{f}\| + \lambda \|\mathbf{A}(p, :)\|_1 \\ & \text{subject to} && \mathbf{A}, \mathbf{b} \geq 0 \end{aligned}$$

539 Where  $\mathbf{Y}(p, :)$  denotes the input movie data indexed at  $p$ -th pixel,  $\mathbf{A}(p, :)$  denotes the spatial  
540 matrix indexed at  $p$ -th pixel across all putative cells, and  $\mathbf{C}$ ,  $\mathbf{b}$ ,  $\mathbf{f}$  denotes the temporal matrix, the  
541 spatial footprint of background term, and the temporal fluctuation of background term,

542 respectively. The scalar  $\lambda$  represents the sparse penalty that controls the balance between the  
543 error term and sparsity term.

544 Lastly, the spatial footprint of the background term is updated in the exact same way, together  
545 with other putative cells. However, the background term the temporal activity used in the spatial  
546 update is not constrained by the autoregressive model. After the spatial footprint of the  
547 background term is updated, we subtract the neural activity (AC) from the input data to get  
548 residual background fluctuations. Then the temporal activity of background term is calculated as  
549 the projection of residual onto the new background spatial footprint, where the raw activities of  
550 each pixel is weighted by the spatial footprint.

551 In other CNMF implementations, the estimated spatial noise is used to determine the scaling of  
552 the  $\ell_1$ -norm term in the target function and control the balance between error and sparsity of the  
553 result. However, in practice we find that it does not always give the best result for all types of  
554 datasets. For example, sometimes the estimated spatial noise is too large, which results in an  
555 overly-conservative estimation of spatial footprints. Hence, we have introduced a sparseness  
556 penalty on top of the estimated scaling factor for the  $\ell_1$ -norm term. This parameter gives users  
557 more control over how sparsity should be weighted in the updating process. The higher the  
558 number, the higher the penalty imposed by the  $\ell_1$ -norm, and the more sparse the spatial  
559 footprints will become. The effect of this parameter can be visualized with the tool shown in  
560 Figure 10. Users can employ this tool to determine the best sparseness penalty for their data,  
561 where the binarized spatial footprint representing non-zero terms should approach the visible  
562 part of the spatial footprint as much as possible, without reducing the amplitude of spatial  
563 footprints to the extent that cells are discarded in the spatial update. Figure 11 shows an  
564 example of the effect of changing the sparseness penalty on the resulting spatial footprints. A  
565 sparseness penalty of 0.1 is considered appropriate in this case. When the sparseness penalty  
566 is set much lower, many of the additional 'fragments' begin to appear in the binarized spatial  
567 footprint, even if they are not part of the cell. On the other hand, when the sparseness penalty is  
568 set too high, some cells are discarded. In the interactive visualization tool, users can inspect the  
569 temporal dynamics of these discarded cells. In general, however, we do not recommend  
570 exploiting the sparseness penalty during the spatial update to filter cells since this step does not  
571 have an explicit model of the temporal signal and thus has no power to differentiate real cells  
572 from noise.

573 In addition, a dilation window parameter must be specified by the user. To reduce the amount of  
574 computation when calculating how each pixel weighs onto each cell, we only update weights for  
575 cells that are close to each pixel. For each cell, an ROI is computed by performing a  
576 morphological dilation process on the previous spatial footprints of that cell. If a pixel lies outside  
577 of a cell's region of interest, this cell will not be considered when updating the pixel's weight.  
578 Thus, the dilation window parameter determines the maximum distance a cell is allowed to grow  
579 during the update compared to its previous spatial footprints. This parameter should be set large  
580 enough so that it does not interfere with the spatial update process, but at the same time not so  
581 large as to impact performance. The expected cell diameter in pixels is a good starting point.

sparse\_penalty: 0.1

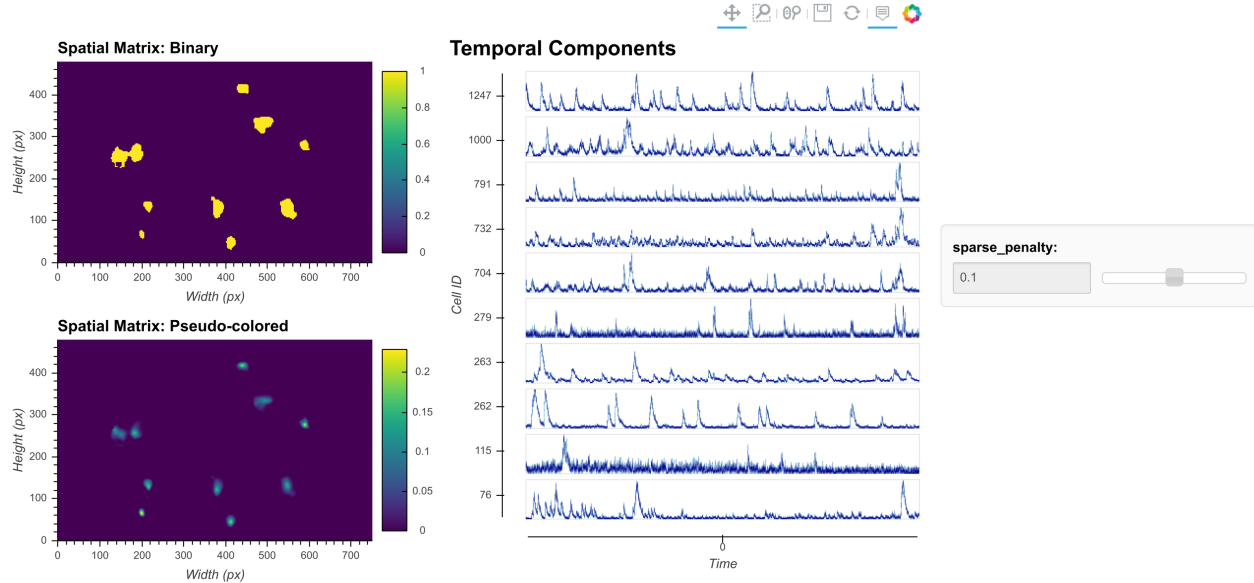

582

583 **Figure 10: Visualization of spatial updates.** Here 10 cells are randomly chosen to pass  
584 through spatial update with different parameters. The resulting spatial footprints, as well as  
585 binarized footprints, are plotted. In addition, the corresponding temporal traces of cells are  
586 plotted. The user can visually inspect the size and shape of the spatial footprints and at the  
587 same time easily determine whether the results are sparse enough by looking at the binarized  
588 footprints.

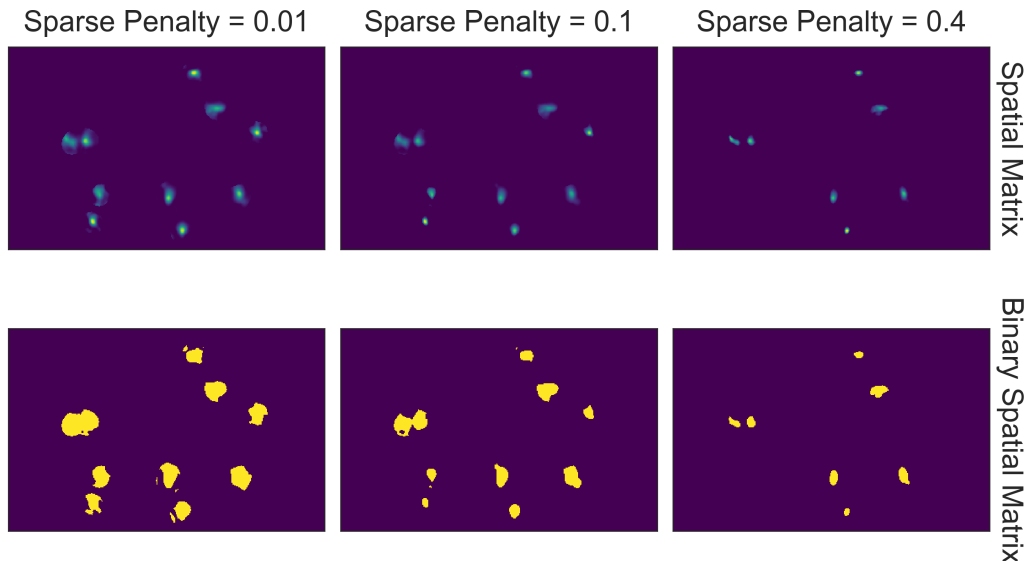

589

590 **Figure 11: Effect of sparseness penalty in spatial update.** Here the sum projection of the  
591 spatial matrix and binarized spatial matrix are shown for 3 different sparse penalties. A  
592 sparseness penalty of 0.1 is considered appropriate in this case. When the sparseness penalty  
593 is set lower, artifacts begin to appear. On the other hand, when the sparseness penalty is set  
594 higher, cells are dropped out.

## 595 Temporal update

596 Next, we proceed to the temporal update of the CNMF algorithm. Please refer to the original  
597 paper for the detailed derivation [37]. Here, given the spatial matrix and background terms,  
598 we update the temporal matrix so that it best fits the input data ( $Y$ ). First, we subtract the  
599 background term from the input data, leaving only the noisy signal from cells. We then project  
600 the data onto the spatial footprints of cells, obtaining the temporal activity for each cell. Next we  
601 estimate a contribution of temporal activity from neighboring overlapping cells using the spatial  
602 footprints of cells, and subtract it from the temporal activity of each cell. This process results in a  
603 two-dimensional matrix representing the raw temporal activity of each cell [41].

604 The CNMF algorithm models the relationship between the underlying ‘spiking’ and the calcium  
605 dynamics of a cell as an auto-regressive (AR) process. It should be noted that although the  
606 underlying process that drives calcium influx is presumably cell firing, the ‘spiking’ signal is  
607 modeled as a continuous variable rather than a binary variable, and strictly speaking, it is only a  
608 de-convolved calcium signal. Following convention, we will refer to this variable as ‘spike signal’,  
609 an approximation of the underlying cellular activity that drives calcium influx. It should be  
610 understood, however, that the exact relationship between this variable and the actual firing rate  
611 of cells is unclear, since the absolute amount of fluorescence generated by a single spike, as  
612 well as the numerical effect of integrating multiple spikes on the resulting calcium signal, is  
613 unknown.

614 We first estimate the coefficients for the AR model. The coefficients of the AR model can be  
615 conveniently estimated from the autocorrelation of the estimated temporal activity. In addition,  
616 noise power for each cell is also estimated directly from the signal. In practice, we find that  
617 during the estimation of the AR model parameters, it is helpful to first smooth the signal,  
618 otherwise the time constant of the AR model tends to be biased by high frequency noise. Users  
619 should again use the peak-to-noise-refinement cut-off frequency for both estimation of the noise  
620 power and smoothing of the signals. Finally, we update the temporal matrix by minimizing a  
621 target function for different cells, similar to what was done with the spatial matrix. Again, the  
622 target function contains a squared error term and a  $\ell_1$ -norm term. We also introduce a  
623 sparseness penalty parameter to control the balance between the two terms. The squared error  
624 term contains the difference between input signal and estimated calcium dynamics, while  
625 the  $\ell_1$ -norm term regulates the sparsity of the “spiking” signal. Pre-estimated AR coefficients  
626 allow for a determined relationship between the ‘spiking’ signal and calcium dynamics for a  
627 given cell. Thus, the problem can be transformed and simplified as minimizing the target  
628 function over ‘spiking’ signals of different cells.

629 In practice, it is computationally more efficient to break down the minimization problem into  
630 smaller pieces and update subsets of cells independently and in parallel. To do so, we first  
631 identify non-overlapping cells using a Jaccard index, which measures the amount of overlap  
632 between the spatial footprints of different cells. Once we identify these individual cells, we can  
633 update them independently so that an optimization problem and target function are formulated  
634 for each cell independently. Here, we set a cutoff Jaccard index where cells above this amount  
635 of overlap are updated in parallel. During the updating process, two additional terms are  
636 introduced: a baseline term to account for constitutive non-zero activity of cells and an initial  
637 calcium concentration to account for a ‘spiking’ that started just prior to recording. The initial

638 calcium concentration term is a scalar that is recursively multiplied by the same AR coefficient  
639 estimated for the cell. The resulting time trace, modeling the decay process of a ‘spiking’ event  
640 prior to the recording, is added on top of the calcium trace. The baseline activity term is also a  
641 scalar that is simply added on top of all the modeled signals. Both terms are often zero, but they  
642 are nevertheless saved and visualized. For each cell, the optimization process can be  
643 expressed formally as:

$$644 \quad \begin{array}{ll} \text{minimize} & \| \mathbf{y}_{ra} - \mathbf{c} - b_0 - c_0 \mathbf{d} \| + \lambda \| \mathbf{Gc} \|_1 \\ \text{subject to} & \mathbf{c}, \mathbf{Gc} \geq 0 \end{array}$$

645 Where  $\mathbf{y}_{ra}$  denotes the input movie data projected onto the spatial footprint of the given cell,  $\mathbf{c}$   
646 denotes the estimated calcium dynamic of the given cell,  $b_0$  denotes the constant baseline  
647 fluorescent activity,  $c_0$  denotes the initial calcium concentration,  $G$  represent a matrix of AR  
648 coefficients such that  $\mathbf{Gc}$  is the estimated ‘spike’ signal,  $\mathbf{d}$  is a vector representing the temporal  
649 decay of a single spike based on the estimated AR coefficients, such that the term  $c_0 \mathbf{d}$   
650 represent the contribution of initial calcium concentration. Similar to spatial update, the scalar  $\lambda$   
651 represents the sparse penalty and controls the balance between the error term and sparsity  
652 term.

653 The  $\ell_1$ -norm in the optimization problem is known to reduce not only the number of non-zero  
654 terms (i.e., promotes sparsity), but also the amplitude/value of non-zero terms. This effect is  
655 unwanted, since in some cases the numerical the spatial update step in CNMF algorithm  
656 and value of the resulting ‘spike’ signal can become too small as a side-effect of promoting  
657 sparsity, making it hard to interpret and compare the ‘spike’ signal for downstream analysis. To  
658 counteract this phenomenon, we introduce a *post hoc* scaling process. After the temporal  
659 update, each cell is assigned a scaling factor to scale all the fitted signals to the appropriate  
660 values. The scaling factor is solved by least square minimizing the error between the fitted  
661 calcium signal and the projected raw signal.

662 The critical parameters in temporal updates are as follows: (1) The order of the AR model,  
663 usually 1 or 2. Users should choose 1 if near-instantaneous rise time is presented in the calcium  
664 dynamics of the input data (i.e., from the relatively slow sampling rate) and should choose 2  
665 otherwise. (2) The cut-off frequency for noise used for both noise power estimation and pre-  
666 smoothing of the data during AR coefficients estimation. Users should use the values set during  
667 peak-to-noise ratio refinement. (3) The threshold for the Jaccard index determining which cells  
668 can be updated independently. Users should use a value as low as possible, as long as the  
669 speed of this step is acceptable (with large amounts of cells packed closely together, a low  
670 threshold may dramatically slow down this step), or visually inspect how sparse the spatial  
671 footprints are and determine what amount of overlap between spatial footprints results in  
672 significant crosstalk between cells. (4) The sparseness penalty is best set through visualization  
673 tools. The effect of any parameter on the temporal update can be visualized through the tool  
674 shown in Figure 12, where the result of the temporal update for 10 randomly selected cells are  
675 plotted as traces. There are a total of 4 traces shown for each cell: the calcium signal, the  
676 deconvolved ‘spiking’ signal, the projected raw signal, and the ‘fitted signal’. The ‘fitted signal’ is  
677 very similar to the calcium signal and is often indistinguishable from the latter. The difference  
678 between them is that the ‘fitted signal’ also includes the baseline term and the initial calcium

679 concentration term. Hence, the ‘fitted signal’ should better follow the projected raw signal, but it  
680 may be less interesting for downstream analysis. Toggling between different parameters  
681 triggers the dynamic update of the plots, helping the user to determine the best parameters for  
682 their data. Additionally, we highlight the effect of the sparseness penalty on resulting fitted  
683 calcium signals and spike signals in Figure 13. The effect is most evident in the ‘fitted spikes’  
684 trace, which corresponds to the spike signal and can arguably be interpreted as a measure of  
685 the underlying neural activity per frame scaled by an unknown scalar. Here, a sparseness  
686 penalty of 0.008 is considered most appropriate. A lower sparseness penalty will introduce  
687 many false positive signals which do not correspond to real calcium dynamics, as can be seen  
688 in the plots. On the other hand, too high a sparseness penalty will produce false negatives  
689 where clear rises in the raw signal are not accompanied by spikes.

sparse\_penalty: 0.008, unit\_id: 264

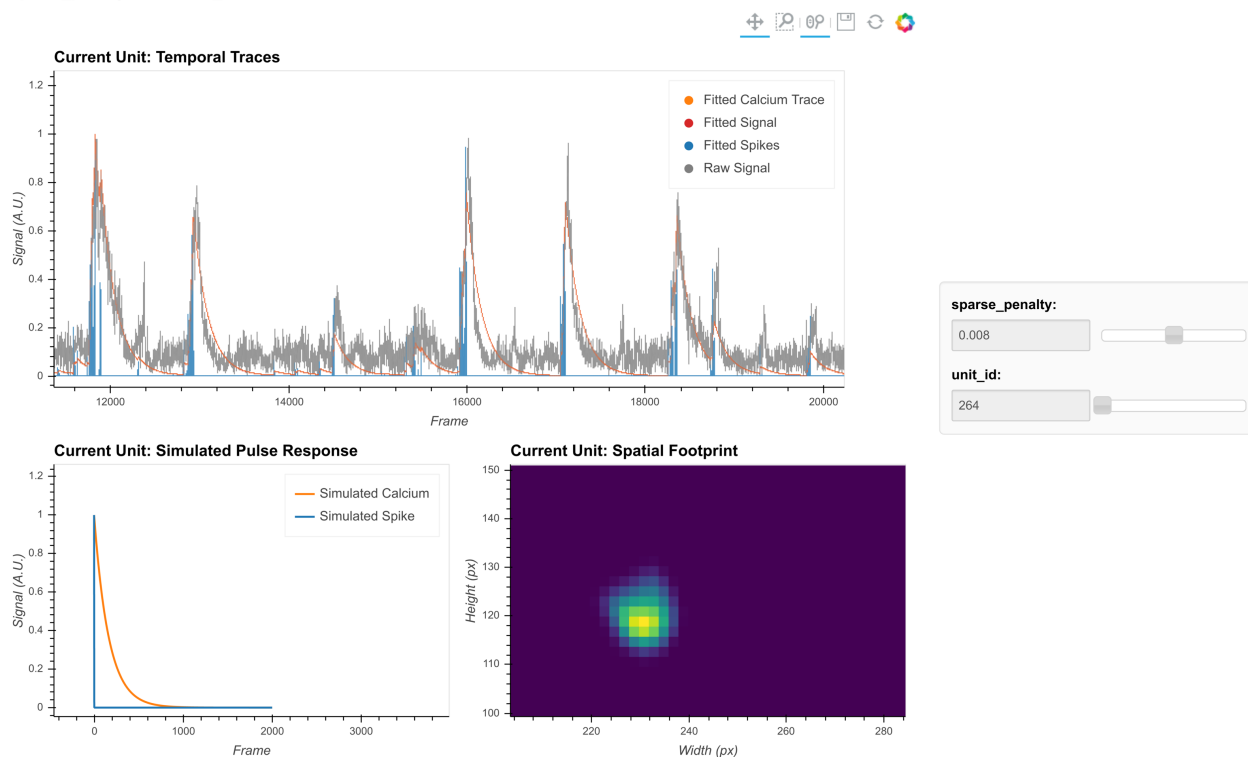

690

691 **Figure 12: Visualization of temporal update.** Here, a subset of cells is randomly chosen to  
692 pass through temporal updates with different parameters. Only one cell is visualized at a given  
693 time and the cell can be selected using the slider on the right. The raw signal, the fitted signal,  
694 the fitted calcium traces, and the spike signals are overlaid in the same plot. In addition, a  
695 simulated pulse-response based on the estimated auto-regressive parameters is plotted with  
696 the same time scale. Furthermore, the corresponding spatial footprint of the cell is plotted for  
697 cross-reference. With a given set of parameters, the user can visually inspect whether the  
698 pulse-response captures the typical calcium dynamics of the cell, and whether the timing and  
699 sparsity of the spike signal fit well with the raw data. The data shown here was acquired with a  
700 framerate of 30 fps.



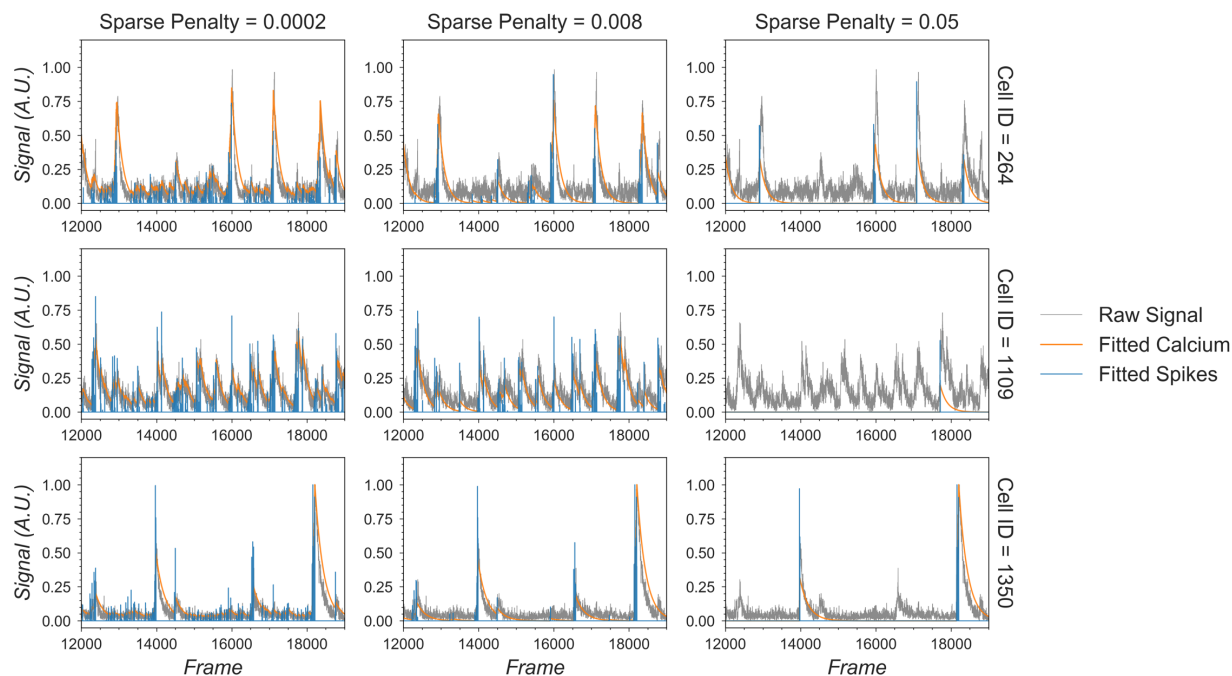

701

702 **Figure 13: Effect of the sparseness penalty in temporal update.** Here, 3 example cells are  
703 selected and passed to the temporal update with different sparseness penalties. The “Raw  
704 Signal” corresponds to the input video projected onto predetermined spatial footprints. The  
705 “Fitted Calcium” and “Fitted Spikes” correspond to the resulting model-fitted calcium dynamics  
706 and spike signals. A sparseness penalty of 0.008 (middle column) is considered appropriate in  
707 this case. The data shown here was acquired with a framerate of 30 fps.

708 Merging cells

709 The CNMF algorithm can sometimes misclassify a single cell as multiple cells. To counteract  
710 this phenomenon, we implement a step to merge cells based on their proximity and temporal  
711 activity. All cells with spatial footprints sharing at least one pixel are considered candidates for  
712 merging, and the pair-wise correlation of their temporal activity is computed. Users can then  
713 specify a threshold where cell pairs with activity correlations above the threshold are merged.  
714 Merging is done by taking the sum of the respective spatial footprints and the mean of all of the  
715 temporal traces for all cells to be merged. Since this is only a simple way to correct for the  
716 number of estimated cells and does not fit numerically with what the model CNMF assumes,  
717 merging is only done between iterations of CNMF, but not at the end.

718 Manual curation

719 Minian provides an interactive visualization to help the users manually inspect the quality of  
720 putative cells and potentially merge or drop cells. At any given time, the visualization shows  
721 spatial temporal activities (top row, middle panel in Figure 14) and temporal dynamics of a  
722 selected subset of cells (bottom row in Figure 14). The spatial temporal activities are shown side  
723 by side with the spatial footprints of all cells and the pre-processed movie (input to CNMF  
724 algorithm) at a given frame (top row of Figure 14). The field of view is synchronized across the

725 three images on the top, so that the users can easily zoom in and compare the estimated spatial  
726 footprints of cells to the input data. The spatial temporal images in the middle show the product  
727 of spatial footprints and calcium dynamics, which represent the model estimated image of a  
728 subset of cells at a given frame. This spatial temporal product is calculated on-the-fly and  
729 synchronized with the frame indicators on the temporal dynamic plots. In this way users can  
730 easily pick times of interest (for example, when a cell has a calcium event), and validate  
731 whether the estimated spatial temporal activities match the input data. Lastly, this interactive  
732 visualization allows the user to either drop false positive cells or merge multiple cells together  
733 via dropdown menus. The result of manual curation is saved as an array with a label for each  
734 unit indicating whether a cell should be discarded or how several cells should be merged. In this  
735 way, only the new label is saved and no data is modified, allowing the user to repeat or correct  
736 the manual curation process if needed.

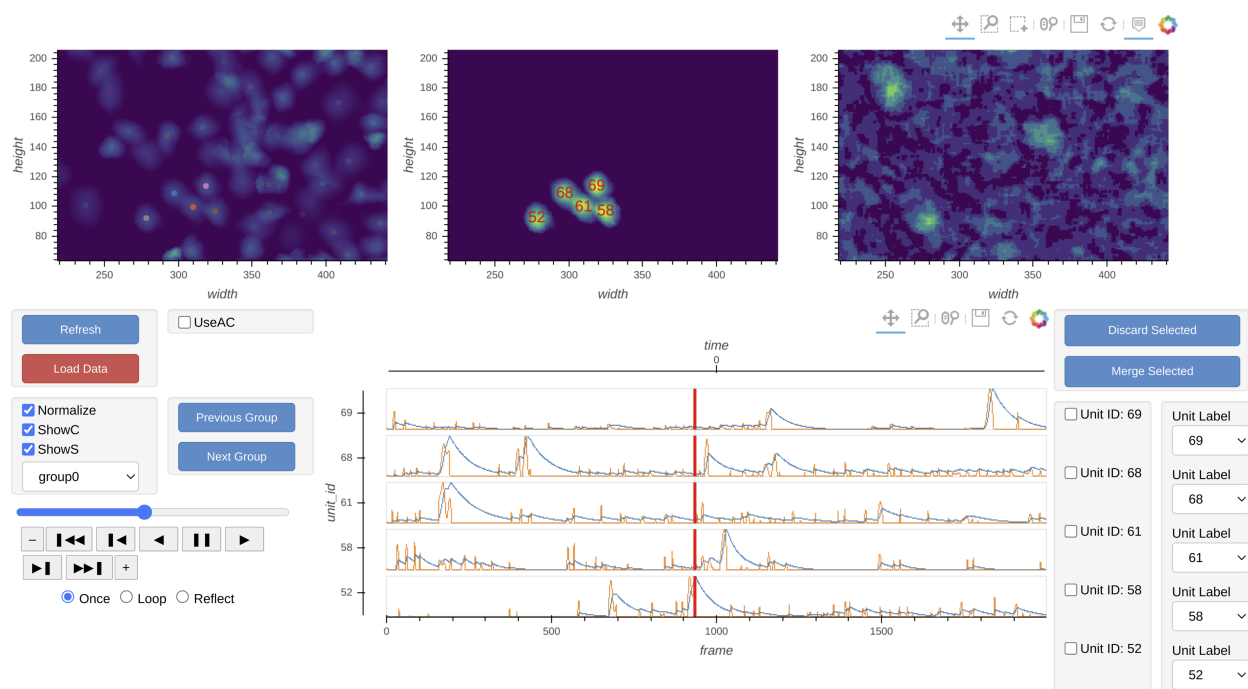

738 **Figure 14: Interactive visualization of Minian output.** The three images on the top show the  
739 spatial footprints of all the cells (left), the spatial temporal activities of selected subset of cells  
740 (middle), and the pre-processed data. The bottom row shows the display control panel (left), the  
741 temporal dynamics of selected subset of cells (middle), and the manual curation panel (right).  
742 The field of view, current frame, and selection of cells are all synced across different plots to  
743 help user focus on a specific region and time. The users can use the control panel to select  
744 groups of cells, change display options for temporal dynamics and spatial temporal activities,  
745 change the current frame or play the movie. In addition, the users can directly select cells from  
746 the spatial footprints plot on the top left. The users can also directly jump to frames by double-  
747 clicking on the temporal dynamic plots. These interactive features help the users quickly focus  
748 on region and time of interests. The manual curation menu on bottom right can be used to  
749 assign unit labels to each cell, which indicate whether a cell should be dropped or merged.

## 750 *Cross registration*

751 After completing the analysis of individual recording sessions, users can register cells across  
752 sessions. While more complex approaches are proposed in other pipelines [16,17], here, our  
753 intention is simplicity. To account for shifts in the field of view from one session to the next, we  
754 first align the field of view from each session based upon a summary frame. Users can either  
755 choose a max projection of each pre-processed and motion-corrected video, or a summed  
756 projection of the spatial footprints of all cells. Users can also choose which session should be  
757 used as the template for registration, to which every other session should be aligned. We use a  
758 standard cross-correlation based on a template-matching algorithm to estimate the translational  
759 shifts for each session relative to the template and then correct for this shift. The weighted  
760 centroid of each cell's spatial footprint is then calculated and pair-wise centroid distances are  
761 used to cross-register cells. A distance threshold (maximum pixel distance) is set. Users should  
762 choose this threshold carefully to reflect the maximum expected displacement of cells across  
763 sessions after registration. We found that a threshold of 5 pixels works well. Finally, a pair of  
764 cells must be the closest cells to each other in order to be considered the same cell across  
765 sessions.

766 To extend this method to more than two sessions, we first cross-register all possible session  
767 pairs. We then take the union of all these pair-wise results and transitively extend the cross-  
768 registration across more than two sessions. At the same time, we discard all matches that result  
769 in conflicts. For example, if cell A in the first session is matched with cell B in the second  
770 session, and cell B is in turn matched with cell C in the third session, but cells A and C are not  
771 matched when directly registering the first and third sessions, all of these matches are  
772 discarded and all three cells are treated as individual cells. We recognize that this approach  
773 might be overly conservative. However, we believe that this strategy provides an easy-to-  
774 interpret result that does not require users to make decisions about whether to accept cell pairs  
775 that could conflict across sessions.

776 To save computation time, we implement a moving window where centroid distances are only  
777 calculated for cell pairs within these windows. Users should set the size of windows to be much  
778 larger than the expected size of cells.

## 779 *Hardware and dependencies*

780 Minian has been tested using OSX, Linux, and Windows operating systems. Additionally,  
781 although we routinely use Minian on specialized analysis computers, the pipeline works on  
782 personal laptops for many common length (~30min) miniature microscope experiments.  
783 Specifications of all of the computers that have been tested can be found in Tested hardware  
784 specifications. We anticipate that any computer with at least 16GB of memory will be capable of  
785 processing at least 20 minutes of recording data, although increased memory and CPU power  
786 will speed up processing. Moreover, due to the read-write processes involved in out-of-core  
787 computation, we recommend that the videos to be processed are held locally at the time of  
788 analysis, preferably on a solid-state drive. The relatively slow speed of transfer via ethernet  
789 cables, Wi-Fi, or USB cables to external drives will severely impair analysis times.

790 Minian is built on top of project Jupyter [42], and depends heavily on packages provided by the  
791 open-source community, including numpy [43], scipy [44], xarray [45], holoviews [46],  
792 bokeh [47], opencv [48], and dask [49]. A complete list of direct dependencies for Minian can be  
793 found in List of dependencies. Of note, the provided install instructions handle the installation of  
794 all dependencies.

## 795 **Results**

796 To validate the accuracy as well as benchmark the performance of Minian, we ran the Minian  
797 pipeline on a series of simulated and experimental datasets and compare the output and  
798 performance to those obtained with CalmAn, which is one of most widely-adopted calcium  
799 imaging analysis pipeline in the field. In addition, we also validated the full workflow of Minian by  
800 applying the pipeline to several recordings of animals running on a linear track and looked at the  
801 stability of place cells. These results are presented in sections below.

### 802 *Validation with simulated datasets*

803 We first validated Minian with simulated datasets. We synthesized different datasets with  
804 varying number of cells and signal levels based on existing works [11,12]. The simulated  
805 datasets contain local background fluctuations, noise, and motions similar to experimental  
806 datasets (See Generation of simulated datasets for details). The field of view contains 512 x 512  
807 pixels and 20000 frames, corresponding to roughly 10 minutes of recording at 30 fps. We  
808 processed the data with both Minian and CalmAn. For Minian, we utilized the visualization  
809 described here to optimize the parameters. For CalmAn, we used the same parameters as  
810 Minian whenever the implementations were equivalent. Otherwise, we followed the suggested  
811 parameters and tweaked them based on the knowledge of simulated ground truth.

812 To compare the results objectively, we first matched the resulting putative cells from the output  
813 of Minian or CalmAn to the simulated ground truth (See Matching neurons for validation for  
814 details). We then calculated three metrics to measure the quality of output: F1 score, spatial  
815 footprints correlation, and temporal dynamics correlation. The F1 score is defined as the  
816 harmonic mean of precision (proportion of detected neurons that are true) and recall (proportion  
817 of ground truth neurons that has been detected). Hence the F1 score measures the overall  
818 accuracy of neuron detection. For each detected neuron that has been matched to ground truth,  
819 we compute Pearson correlation between the estimated and ground truth spatial footprint, as  
820 well as the Pearson correlation between the estimated calcium dynamic and the ground truth  
821 calcium dynamic. We then take the median correlation across all the matched neurons to  
822 measure the overall quality of estimated spatial footprints and temporal dynamics.

823 As shown in Figure 15, both Minian and CalmAn achieve similar and near perfect levels (> 0.95)  
824 of F1 score across all conditions. Similarly, the spatial footprints remain nearly perfect (> 0.95)  
825 for both pipelines across all conditions. At the lowest signal level (0.2), both pipelines suffer from  
826 decreased correlation of temporal dynamics. This is likely due to noise and background  
827 contaminating the true signal. Overall, these results show that the Minian and CalmAn pipelines  
828 perform similarly well in terms of output accuracy on simulated datasets.

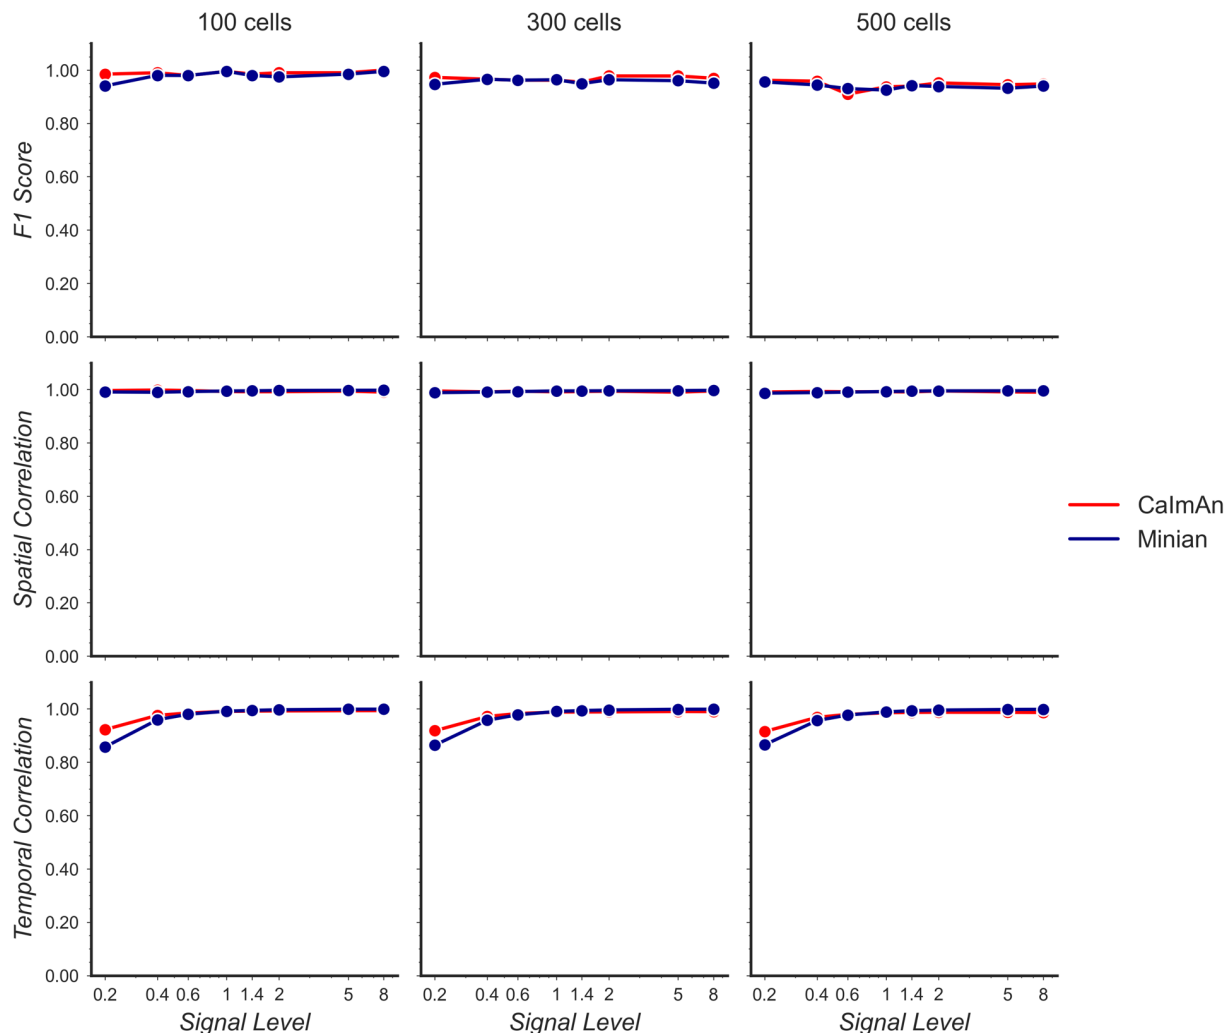

829

830 **Figure 15: Validation of Minian with simulated datasets.** Simulated datasets with varying  
 831 signal level and number of cells are processed through Minian and CalmAn. The F1 score (top),  
 832 median correlation of spatial footprints (middle), and median correlation of temporal dynamics  
 833 (bottom) are plotted as a function of signal level. Both pipelines achieve near perfect ( $> 0.95$ ) F1  
 834 scores and spatial footprint correlation across all conditions. The correlation of temporal  
 835 dynamics are lower when the signal level is 0.2, but remains similar across the two pipelines  
 836 overall.

837 Additionally, we want to validate the deconvolved signal from Minian output, since this is usually  
 838 the most important output for downstream analysis. Our ground truth spikes are simulated as  
 839 binary signals. However, in reality calcium activity often reflect the integration of several spikes,  
 840 and the deconvolved signals from Minian output are real-valued. Because of this, we down-  
 841 sampled both the ground truth spikes and deconvolved signals by 5 times, and then calculated  
 842 Pearson correlation for all matched cells. The resulting correlation is summarized in Figure 16  
 843 A. Our results indicate that the deconvolved output from Minian is highly similar to ground truth  
 844 spikes when signal level is high, and the correlation asymptote and approach 1 when signal  
 845 level is higher than 1. The lower correlation corresponding to low signal level is likely due to the

846 background and noise contamination being stronger than signal. In line with this idea, the  
847 detected “spikes” from the deconvolved signals closely match those from ground truth, as  
848 shown by the example traces in Figure 16 B. The main difference between the two traces is the  
849 amplitude of the deconvolved signals, which is prone to be influenced by local background and  
850 noise. Overall, these results suggest that Minian can produce deconvolved signals that are  
851 faithful to ground truth and suitable for downstream analysis.

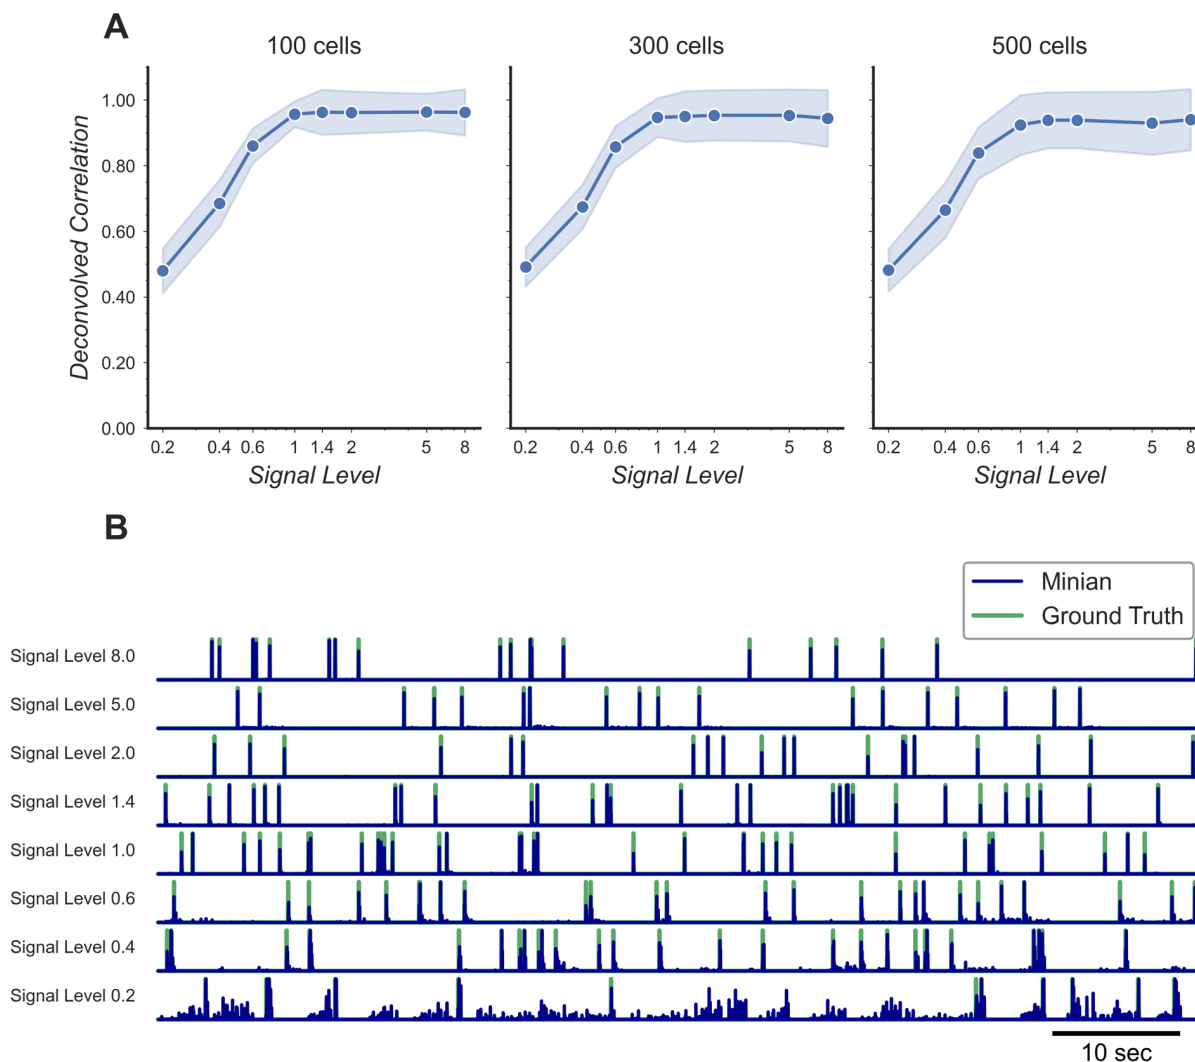

852

853 **Figure 16: Validation of deconvolved signal from Minian.** (A) Correlation of deconvolved  
854 signals from Minian output with simulated ground truth. The mean correlation across all cells  
855 (blue line) and the standard deviation (light blue shade) are shown separately for different signal  
856 levels and number of cells. The correlation asymptote and approach 1 when signal level is  
857 higher than 1. (B) Example deconvolved traces from Minian output overlaid with simulated  
858 ground truth. One representative cell is drawn from each signal level. The binary simulated  
859 spikes are shown in green, with the real-valued Minian deconvolved output overlaid on top in  
860 blue. The deconvolved signals closely match the ground truth and the main difference between

861 *the two signals is in the amplitude of the deconvolved signals, which tend to be influenced by*  
862 *local background.*

### 863 *Validation with experimental datasets*

864 We next validated Minian with experimental datasets. The data was collected from hippocampal  
865 CA1 regions in animals performing a spatial navigation task. 6 animals with different density of  
866 cells were included in the validation dataset. The recordings are collected with 608 x 608 pixels  
867 at 30 fps and lasts 20 min (~36000 frames). Due to difficulties in obtaining ground truth for  
868 experimental data, we choose to validate Minian with CalmAn, which has been established as  
869 one of the most accurate existing pipelines. To evaluate the results objectively, we matched  
870 resulting ROIs from Minian with those from CalmAn using the same approach as in the  
871 Validation with simulated datasets section. We then calculated correlation of spatial footprints  
872 and temporal activity between matched ROIs from the two pipelines. Across the 6 datasets, the  
873 mean F1 score is 0.73 (sem +/-0.03). The mean spatial footprints correlation is 0.84 (sem +/-  
874 0.02), and the mean temporal activity correlation is 0.86 (sem +/-0.02). An example field of view  
875 and temporal activity from matched ROIs are shown in Figure 17. Our results indicate that most  
876 of the ROIs detected by Minian and CalmAn correspond to the same population of putative  
877 cells, and the resulting spatial footprints and temporal activity are nearly identical. These cells  
878 tend to cluster near the center of the field of view, which usually have better signal-to-noise  
879 ratio. However, the cells near the edge of the field of view usually have low intensity and spatial  
880 consistency due to the optical property of GRIN lens. As a consequence, Minian and CalmAn  
881 might detect different population of cells near the border of field of view, due to differences in  
882 pre-processing and initialization between the two pipelines. We have chosen to use the same  
883 set of parameters across all datasets so that the results are easier to interpret, hence the  
884 parameters we used were relatively conservative. In practice, the users can further fine-tune the  
885 parameters for each recording so that Minian would be able to capture all the low signal cells in  
886 the field of view. Overall, these results suggest that the output of Minian is highly similar to  
887 CalmAn when analyzing experimental datasets.

**A**

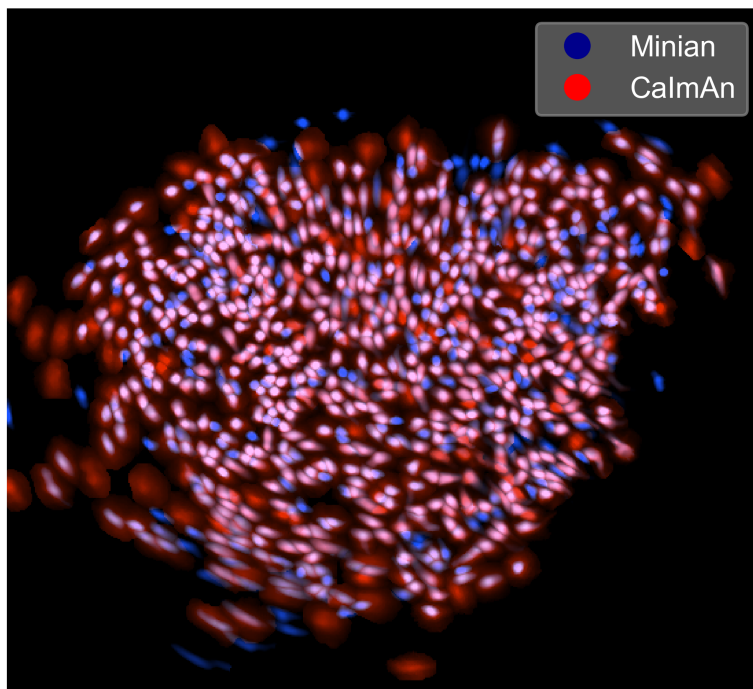

**B**

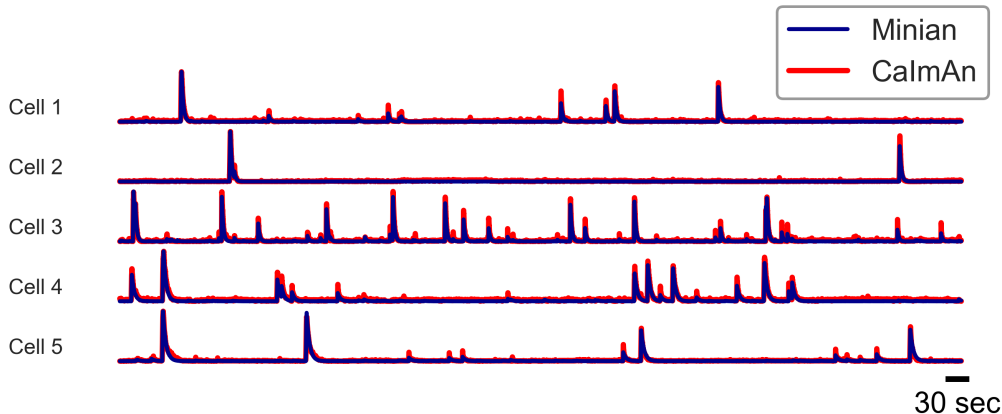

888

889 **Figure 17: Example output of Minian and CalmAn with experimental datasets. (A)** An  
890 example field-of-view from one of the experimental datasets. The spatial footprints from Minian  
891 and CalmAn are colored as blue and red respectively, and overlaid on top of each other. Most  
892 of the spatial footprints from both pipelines overlap with each other. **(B)** 5 example matched  
893 temporal activity from Minian and CalmAn overlaid on top of each other. The extracted temporal  
894 activity are highly similar across the two pipelines.



## 895 *Benchmarking computational performance*

896 To see how the performance of Minian scales with different input data size, we synthesized  
897 datasets with varying number of cells and number of frames (recording length). The field of view  
898 contains 512 x 512 pixels (same as those used in validation of accuracy), and the signal level  
899 was held constant at 1 to make sure both Minian and CalmAn can detect roughly equal number  
900 of neurons during the pipeline. To this end, we tracked two metrics of performance: the total  
901 running time of the pipeline and the peak memory usage during running. The running time was  
902 obtained by querying operating system time during the pipeline. The memory usage was  
903 tracked with an independent process that queries memory usage of the pipeline from the  
904 operating system on a 0.5 seconds interval. Both pipelines were set to utilize 4 parallel  
905 processes during the run across all conditions. All benchmarking are carried out on a custom-  
906 built linux machine (Model "Carbon" under Tested hardware specifications)

907 As shown in Figure 18, the run time of both Minian and CalmAn scales linearly as a function of  
908 input recording length. The exact running times vary depending on number of cells as well as  
909 whether visualization is included in the processing, but in general the running time is similar  
910 across both pipelines. On the other hand, the peak memory usage of CalmAn scales linearly  
911 with recording length when the number of parallel processes was set to be constant. At the  
912 same time, the peak memory usage of Minian stays mostly constant across increasing number  
913 of frames. This is likely due to the flexible chunking implementation of Minian (See Parallel and  
914 out-of-core computation with dask), where Minian was able to break down computations into  
915 chunks in both the spatial and the temporal dimensions depending on which way is more  
916 efficient. In contrast, CalmAn only splits data into different spatial chunks (patches), resulting in  
917 a linear scaling of memory usage with recording length for each chunk-wise computation.  
918 Additionally, we run Minian and CalmAn with different number of parallel processes on the  
919 simulated dataset with 28000 frames and 500 cells. As expected, with more parallel processes  
920 the performance improves and the run time decreases but at the same time the total peak  
921 memory usage increases. The tradeoff between run time and peak memory usage are shown in  
922 Figure 19. In conclusion, these results show that in practice, Minian is able to perform as fast as  
923 CalmAn, while maintaining near constant memory usage regardless of input data size. This  
924 allows the users to process much longer recordings with limited RAM resources.

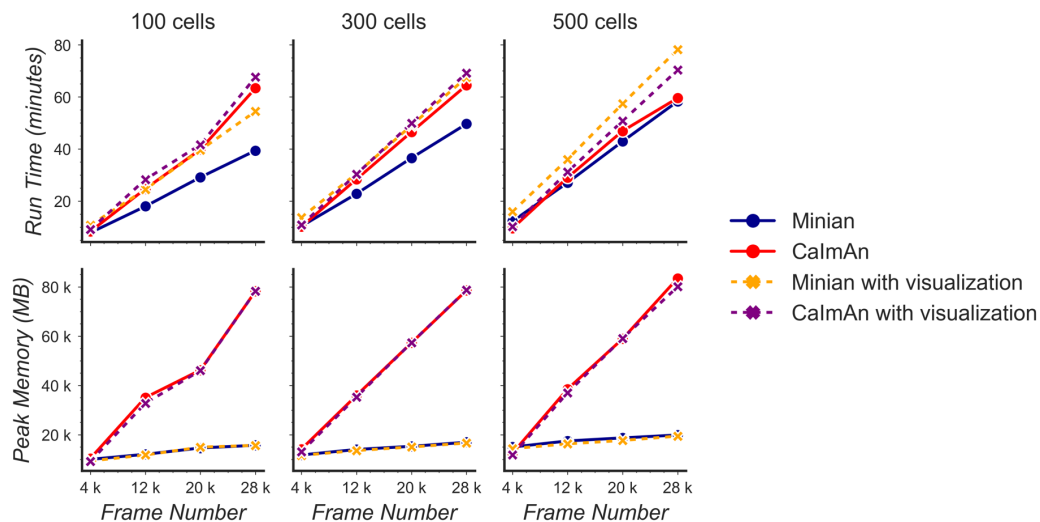

925

926 **Figure 18: Benchmarking of computational performance.** Data with varying number of cells  
 927 and frames were processed through Minian and CalmAn. The run time (top) and peak memory  
 928 usage (bottom) were recorded and plotted as a function of frame number. For both pipelines,  
 929 the run time scales linearly as a function of the number of frames and remains similar across the  
 930 pipelines. However, the peak memory usage for CalmAn also scales linearly as the number of  
 931 frames increases, while Minian maintains a relatively constant peak memory usage across  
 932 different frame numbers and cell numbers.

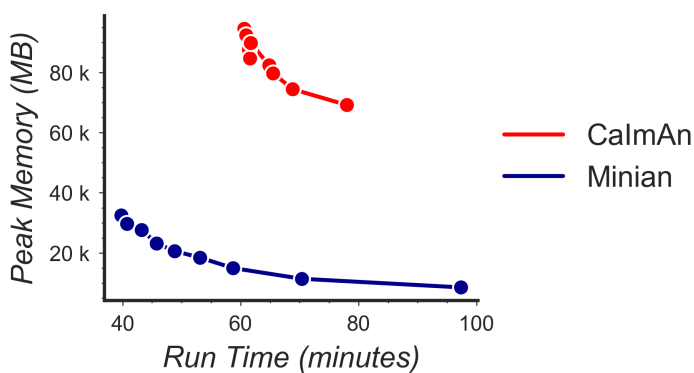

933

934 **Figure 19: Tradeoff between run time and memory usage.** Simulated data with 500 cells and  
 935 28000 frames were processed through Minian and CalmAn with different numbers of parallel  
 936 processes. We varied the number of parallel processes from 2 to 10, and the resulting memory  
 937 usage is plotted as a function of run time. For both pipelines, the curve takes a hyperbola  
 938 shape, showing the tradeoff between run time and memory usage.

939 **Validation with hippocampal CA1 place cells**

940 In addition to direct validation of the output for single session, we wanted to validate the  
 941 scientific significance of the spike signal, as well as the quality of the cross-session registration,  
 942 and ensure that Minian is capable of generating meaningful results consistent with the existing

943 literature. We leveraged the extensively documented properties of place cells in rodent  
944 hippocampal CA1 [50]. Place cells have been shown to have consistent place fields across at  
945 least two days [33,51] with only a minority of detected cells undergoing place field remapping.  
946 Here, we looked at place field stability across two linear track sessions (Figure 20 A). Briefly,  
947 animals were trained to run back and forth on a 2 m linear track while wearing a Miniscope to  
948 obtain water rewards available at either end [35]. The time gap between each session was 2  
949 days. We record calcium activity in dorsal CA1 region with a FOV of 480 x 752 pixels collected  
950 at 30 fps. Each recording session lasts 15 min (~27000 frames). Calcium imaging data were  
951 analyzed with Minian, while the location of animals was extracted with an open-source  
952 behavioral analysis pipeline ezTrack [18]. The resulting calcium dynamics and animal behavior  
953 were aligned with the timestamps recorded by Miniscope data acquisition software  
954 (miniscope.org). We used the spike signal for our downstream analysis. To calculate average  
955 spatial activity rate, we binned the 2-meters long track into 100 spatial bins. In addition,  
956 we separated the epochs when the animals are running in opposite directions, resulting in a  
957 total of 200 spatial bins. We then smoothed both the binned activity rate and animal's  
958 occupancy with a Gaussian kernel with a standard deviation of 5 cm. We classified place cells  
959 based on three criteria: a spatial information criterion, a stability criterion, and a place field size  
960 criterion [35]. (See Classification of place cells for more detail.) Finally, we analyzed cells that  
961 are cross-registered by Minian and are classified as place cells in both sessions. We then  
962 calculated the Pearson correlation for the average spatial firing rate for each cross-registered  
963 cell. We found that, on average, place cells have a correlation of ~0.6, which is consistent with  
964 the existing literature [35].

965 Next, we validated the cross-session registration to verify that the correct cells were being  
966 matched across days. We translated the spatial footprints of the second session in both  
967 directions up to 50 pixels and registered the cells with the shifted spatial footprints. We then  
968 carried out the same analysis with the registration results from shifted spatial footprints. We  
969 found that the average correlations between spatial firing patterns have higher values when the  
970 shifts are close to zero (Figure 20 B).

971 In conclusion, Minian can reliably process *in vivo* calcium imaging data and produce results that  
972 are in agreement with the known properties of rodent CA1. Minian can thus help neuroscience  
973 labs easily implement and select the best parameters for their calcium analysis pipeline by  
974 providing detailed instructions and visualizations.

A

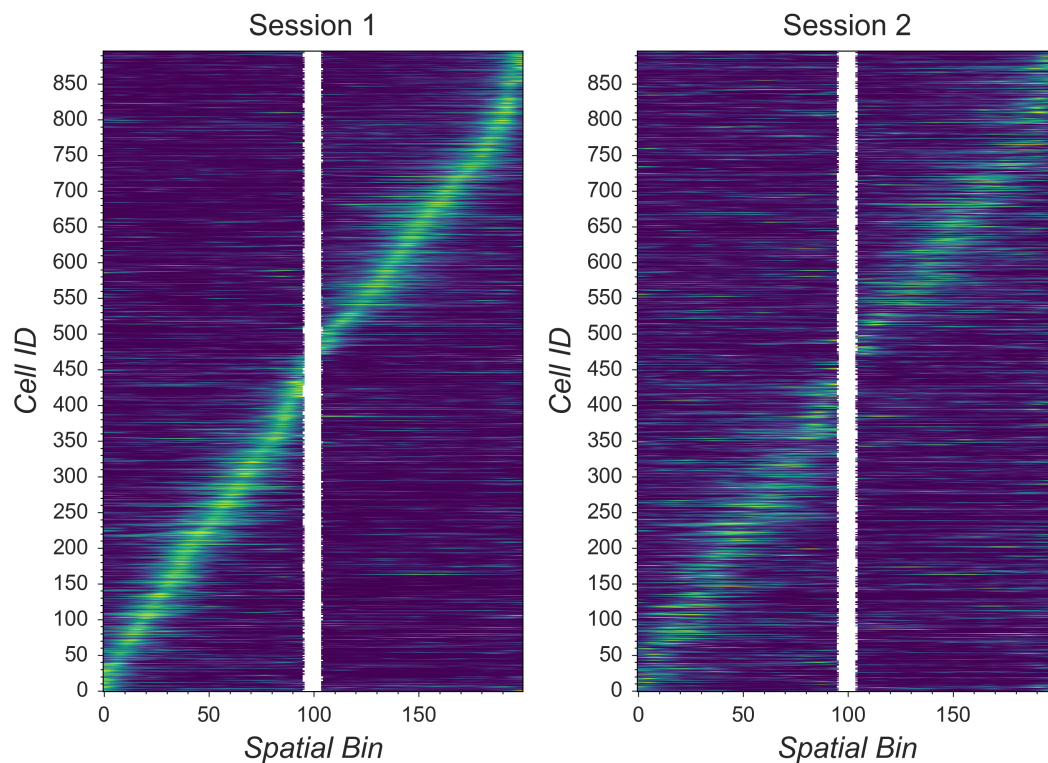

B

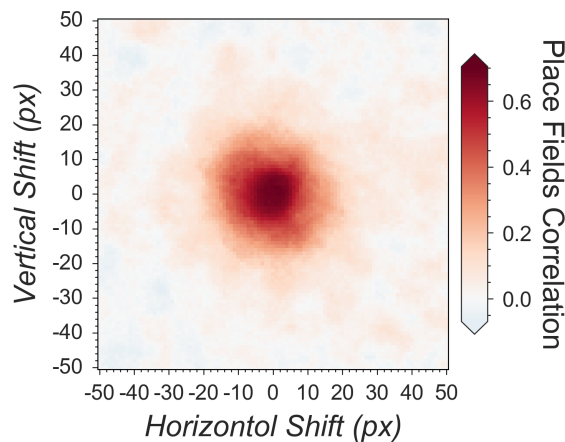

975

976 **Figure 20: Validation of Minian with hippocampal CA1 place cells. (A)** Matching place cells  
977 from two recording sessions. The cells are matched from one session to the other using the  
978 cross-session registration algorithm and sorted based on place field in the first session. In both  
979 sessions, animals run on a 2-meter-long linear track with water reward at both ends. The track  
980 is divided into 200 spatial bins. The mean “firing” rate calculated from the spike signal for each  
981 cell is shown. Cell IDs are assigned by Minian when each session is analyzed independently.  
982 **(B)** Averaged correlations of spatial firing rates with different artificial shifts. We artificially shifted  
983 the spatial footprints of the second linear track session, then carried out registration and  
984 calculated a mean correlation of spatial firing rates for all place cells. The artificial shifts were  
985 relative to the aligned spatial footprints and range from -50 to 50 pixels.

## 986 **Discussion**

### 987 *Making open science more accessible*

988 Neuroscience has benefitted tremendously from open-source projects, ranging from do-it-  
989 yourself (DIY) hardware [1] to sophisticated algorithms [2]. Open-source projects are impactful  
990 because they make cutting-edge technologies available to neuroscience labs with limited  
991 resources, as well as opening the door for innovation on top of previously established methods.  
992 We believe that openly sharing knowledge and tools is just the first step. Making knowledge  
993 accessible even to non-experts should be one of the ultimate goals of open-source projects.

994 With the increasing popularity of miniaturized microscopes [36], there has been significant  
995 interest in analysis pipelines that can reliably extract neural activities from the data. Numerous  
996 algorithms have been developed to solve this problem [11,13,15,19,20,37], and many of them  
997 are implemented as open-source packages that can function as a one-stop pipeline [12,14,16].  
998 However, one of the biggest obstacles for neuroscience labs in adopting analysis pipelines is  
999 the difficulty in understanding the exact operation of the algorithms, leading to two notable  
1000 challenges: first, researchers face difficulties adjusting the parameters when the data they have  
1001 collected are out of the expected scope of the pipeline's default parameters. Second, even after  
1002 neural activity data is obtained, it is hard for researchers to be sure that they have chosen the  
1003 best approaches and parameters for their dataset. Indeed, it has been found that depending on  
1004 the features of the data and the metric used, more sophisticated algorithms do not always out-  
1005 perform simpler algorithms [52], making it even harder for researchers to interpret the results  
1006 obtained from some analysis pipelines. Researchers therefore often have to outsource data  
1007 analysis to experts with strong computational backgrounds or simply trust the output of the  
1008 algorithms being used. Minian was created to address these challenges. By providing not only  
1009 detailed documentation of all functions, but also by providing rich interactive visualizations,  
1010 Minian helps researchers to develop an intuitive understanding of the operations of algorithms  
1011 without expertise in mathematics or computer science. These insights help researchers choose  
1012 the best parameters, as well as to become more confident in their interpretation of results.  
1013 Furthermore, transparency regarding the underlying algorithms enables researchers to develop  
1014 in-house modifications of the pipeline, which is a common practice in neuroscience labs. We  
1015 believe that Minian will contribute to the open science community by making the analysis of  
1016 calcium imaging data more accessible and understandable to neuroscience labs.

### 1017 *Limitations*

1018 Although Minian provides users with insights into the parameter tuning process across different  
1019 brain regions, these insights are achieved mainly through visual inspection. However, the  
1020 performance of an analysis pipeline should be measured objectively. While calcium imaging has  
1021 been validated with electrophysiology under *ex vivo* settings [53], ground-truth data for single-  
1022 photon *in vivo* calcium imaging are lacking, making objective evaluation of the algorithms  
1023 difficult. Therefore, here we have provided only indirect validations of the pipeline by  
1024 recapitulating well-established biological findings.

## 1025 **Supplemental information**

### 1026 *Parallel and out-of-core computation with dask*

1027 In Minian, we use a modern parallel computing library called dask to implement parallel and out-  
1028 of-core computation. Dask divides the data into small chunks along all dimensions, then flexibly  
1029 merges the data along some dimensions in each step. We leverage the fact that each step in  
1030 our pipeline can be carried out chunk by chunk independently along either the temporal (frame)  
1031 dimension or the spatial (height and width) dimensions, thus requiring no interpolation or special  
1032 handling of borders when merged together, producing results as if no chunking had been done.  
1033 For example, motion correction and most pre-processing steps that involve frame-wise filtering  
1034 can be carried out on independent temporal chunks, whereas computation of pixel correlations  
1035 can be carried out on independent spatial chunks. Similarly, during the core CNMF computation  
1036 steps, spatial chunking can be used during update of spatial footprints, since spatial update is  
1037 carried out pixel by pixel. Meanwhile, temporal chunking can be used when projecting the input  
1038 data onto spatial footprints of cells, which is usually the most memory-demanding step.  
1039 Although the optimization step during the temporal update is computed across all frames and no  
1040 temporal chunking can be used, we can still chunk across cells, and in practice the memory  
1041 demand in this step is much smaller comparing to other steps involving raw input data.  
1042 Consequently, our pipeline fully supports out-of-core computation, and memory demand is  
1043 dramatically reduced. In practice, a modern laptop can easily handle the analysis of a full  
1044 experiment with a typical recording length of up to 20 minutes. Dask also enables us to carry out  
1045 lazy evaluation of many steps where the computation is postponed until the result is needed, for  
1046 example, when a plot of the result is requested. This enables selective evaluation of operations  
1047 only on the subset of data that will become part of the visualization and thus helps users to  
1048 quickly explore a large space of parameters without committing to the full operation each time.

### 1049 *Seeds refinement with a Gaussian-Mixture-Model*

1050 As described in the main text, an alternative strategy to thresholding fluorescence intensity  
1051 during seeds initialization is to explicitly model the distribution of fluorescence fluctuations of all  
1052 candidate seeds and select those with relatively higher fluctuation. Here, we describe this  
1053 process and the rationale. Since the seeds are generated from local maxima, they include noise  
1054 from relatively empty regions with no actual cells. The seeds from these regions usually have  
1055 low fluctuations in fluorescence across time and can be classified as spurious. To identify these  
1056 cases, we compute a range of fluctuation for each seed (range of min-max across time), and  
1057 model these ranges with a Gaussian-Mixture-Model of two components. The fluctuations from  
1058 'noise' seeds compose a Gaussian distribution with low fluctuation, while seeds from actual cells  
1059 assume a higher degree of fluctuation and form another Gaussian distribution with a higher  
1060 mean. Any seed whose fluctuations belong to the lower Gaussian distribution is discarded in  
1061 this step. To compute the range of fluctuation for each seed, we compute the difference  
1062 between the 99.9 and 0.1 percentile of all fluorescence values across time, which is less biased  
1063 by outliers than the actual maximum and minimum values.

1064 Normally, this step is parameter-free. In rare cases, there are regions containing noise while  
1065 other regions are almost completely dark. Thus, seeds from these two regions will form two  
1066 peaks in the distribution of what the user would consider 'bad seeds', and a Gaussian-Mixture-

1067 Model with two components will no longer be valid. In such cases users can tweak the number  
1068 of components (number of modeled Gaussian distributions), as well as the number of  
1069 components to be considered as composed of real signal. However, because the two noise  
1070 distributions are likely to overlap to some degree, using two components will likely suffice. The  
1071 distribution of fluctuations, the Gaussian-Mixture-Model fit, and the resulting seeds, are  
1072 visualized, enabling the user to judge the appropriateness and accuracy of this step. It should  
1073 be noted that in practice, we have found this process to depend heavily on the relative  
1074 proportion of the 'good' and 'bad' seeds and can easily result in a significant amount of false  
1075 negatives if the proportion of the 'bad' seed is too low. This makes the Gaussian-Mixture-Model  
1076 approach less stable and in general less preferable to simple thresholding unless a good  
1077 threshold of fluorescence intensity cannot be easily determined.

### 1078 *Generation of simulated datasets*

1079 We use a pipeline modified from [11] and [12] to generate simulated data for validation and  
1080 benchmarking of Minian. Specifically, we generate a 512 x 512 pixels field of view with varying  
1081 number of frames and neurons. The neurons are simulated as spherical 2-D Gaussian. The  
1082 center of neurons are drawn uniformly from the whole field of view, and the Gaussian widths  $\sigma_x$   
1083 and  $\sigma_y$  for each neuron are drawn from  $\mathcal{N}(15, 5^2)$ , with a minimum value of 3. Spikes are  
1084 simulated from a Bernoulli process with a 0.01 probability of spiking per frame. Calcium  
1085 dynamics are simulated by convolving the spikes with a temporal kernel  $g(t) = \exp(-t/\tau_d) -$   
1086  $\exp(-t/\tau_r)$ , with rise time  $\tau_r = 5$  frame and decay time  $\tau_d = 60$  frame. We simulate the spatial  
1087 footprints of backgrounds as spherical 2-D Gaussian distributed uniformly across field of view.  
1088 In total 300 independent background terms are used for all simulation. The Gaussian widths are  
1089 drawn from  $\mathcal{N}(900, 50^2)$  The temporal dynamic of backgrounds are simulated from a  
1090 constrained Gaussian random walk process with steps drawn from  $\mathcal{N}(0, 2^2)$ , then clipped to be  
1091 non-negative and gaussian smoothed temporally with a variance of 60 frames. We also simulate  
1092 motion of the field of view as 2-D translations. The translational shift in each direction is  
1093 simulated from a constrained Gaussian random walk process with steps drawn from  
1094  $\mathcal{N}(-0.2d, 1)$ , where  $d$  is the current amount of shift. Lastly, we add a  $\mathcal{N}(0, 0.1^2)$  Gaussian noise  
1095 to the entire simulated data. The activity of neurons are multiplied by a scalar before combining  
1096 with the background activity and noise. We call this scalar 'signal level'.

1097 To validate the accuracy of Minian output, we simulate data with different signal level and  
1098 number of cells. The signal levels we use are 0.2, 0.4, 0.6, 1.0, 1.4, 1.8. The number of cells we  
1099 use are 100, 300, 500. On the other hand, to benchmark the performance of Minian, we  
1100 simulate data with different number of frames and cells. The number of frames vary from 4000  
1101 to 28000 with a step size of 8000. The number of cells we use are 100, 300, 500.

### 1102 *Matching neurons for validation*

1103 To compute different metrics of the accuracy of Minian output, we first need to match the  
1104 putative neurons from Minian output with neurons from ground truth. To obtain this mapping we  
1105 first compute the max projection of spatial footprints across all neurons. We then register the  
1106 max projection of putative spatial footprints to the max projection of ground truth spatial  
1107 footprints, by estimating a translational shift between the two max projection images. After  
1108 correcting for translational shifts, we compute the center-of-mass for all neurons, from which we

1109 obtain a  $N \times M$  pairwise distance matrix, where  $N$  and  $M$  are number of neurons detected by  
1110 Minian and number of ground truth neurons, respectively. We then calculate an optimal  
1111 mapping by solving the linear assignment problem of minimizing the total cost (distance) of a  
1112 particular cell mapping. Lastly, we threshold the resulting mapping by discarding any matched  
1113 cells that has a distance larger than 15 pixels.

#### 1114 *Classification of place cells*

1115 We use the spatially-binned averaged ‘firing’ rate calculated from spike signals to classify  
1116 whether each cell is a place cell. A place cell must simultaneously satisfy three criteria: a spatial  
1117 information criterion, a stability criterion, and a place field size criterion. To determine whether a  
1118 cell has significant spatial information or stability, we obtain a null distribution of the  
1119 measurements (spatial information and stability) with a bootstrap strategy, where we roll the  
1120 timing of activity by a random amount for each cell 1000 times. The observed spatial information  
1121 or stability is defined as significant if it exceeds the 95th percentile of its null distribution ( $p <$   
1122  $0.05$ ). For the spatial information criterion, we use the joint information between ‘firing’ rate and  
1123 an animal’s location measured in bits per ‘spike’. For the stability criterion, we calculate the  
1124 Fisher  $z$ -transformation of the Pearson correlation coefficient between spatial ‘firing’ patterns  
1125 across different trials within a recording session. A trial is defined as the time which the animal  
1126 runs from one end of the linear track to the other and returns to the starting location. We  
1127 calculate the  $z$ -transformed correlation between the odd number of trials and the even number  
1128 of trials, as well as between the first half of the trials and the second half of the trials. We then  
1129 average these two measures of correlations and use that as the measure of stability for a cell.  
1130 Lastly, For the place field size criterion, we define the place field of each cell as the longest  
1131 contiguous spatial bin where the averaged ‘firing’ rate exceeded the 95th percentile of all  
1132 averaged firing rate bins. A cell must have a place field larger than 4 cm (i.e., 2 spatial bins) to  
1133 pass the place field size criterion.

#### 1134 *Animals*

1135 Adult male C57/BL6J mice from Jackson Laboratories were used for all testing. Animals were  
1136 housed in a temperature, humidity and light controlled vivarium down the hall from the  
1137 experimental testing rooms with lights on at 7 a.m. and off at 7 p.m. Water was restricted to  
1138 maintain a body weight of 85–90%. Water deprivation consisted of allotting the animal ~1 mL of  
1139 water per day, including water obtained during testing. Water not obtained during testing was  
1140 given after the testing period. Animals were acclimated to handling for 5–7 days prior to  
1141 training/testing. All experiments were performed in accordance with relevant guidelines and  
1142 regulations approved by the Institutional Animal Care and Use Committee of Icahn School of  
1143 Medicine at Mount Sinai (Reference #: IACUC-2017-0361, Protocol #: 17-1994).

#### 1144 *Tested hardware specifications*

1145 The hardware specifications of computers that have effectively run Minian are summarized in  
1146 the table below.



1147 *Table 1: A list of computers tested with Minian with specifications. Listed roughly by*  
 1148 *increasing computation power.*

| Manufacture  | Model           | CPU                                      | RAM   | Storage   | Operating System   |
|--------------|-----------------|------------------------------------------|-------|-----------|--------------------|
| custom-built | Carbon          | AMD Ryzen Threadripper 2950X 4.4GHz x 16 | 128GB | 2TB SSD   | Ubuntu 18.04       |
| Microsoft    | Surface Pro 6   | Intel Core i5-8250U 1.6GHz x 4           | 8GB   | 256GB SSD | Windows 10         |
| Dell         | Precision 5530  | Intel Core i5-8400H 2.5GHz x 4           | 16GB  | 256GB SSD | Ubuntu 18.04       |
| Apple        | MacBook Pro 152 | Intel Core i7-8559U 2.7GHz x 4           | 16GB  | 1TB SSD   | macOS 10.14 Mojave |
| custom-built | Amethyst        | Intel Xeon E5-1650 3.6GHz x 6            | 128GB | 6TB HDD   | Ubuntu 17.1        |

1149 *List of dependencies*

1150 *Table 2: A list of open-source packages and the specific versions on which Minian*  
 1151 *depends.*

| Package     | Version |
|-------------|---------|
| av          | 7.0     |
| bokeh       | 1.4     |
| bottleneck  | 1.3     |
| cairo       | 1.16    |
| cvxpy       | 1.0     |
| dask        | 2.11    |
| datashader  | 0.1     |
| distributed | 2.11    |
| ecos        | 2.0     |
| ffmpeg      | 4.1     |
| fftw        | 3.3     |
| holoviews   | 1.12    |
| ipython     | 7.12    |
| ipywidgets  | 7.5     |
| jupyter     | 1.0     |
| matplotlib  | 3.1     |
| natsort     | 7.0     |
| netcdf4     | 1.5     |
| networkx    | 2.4     |
| nodejs      | 13.9    |
| numba       | 0.48    |

|             |        |
|-------------|--------|
| numpy       | 1.18   |
| opencv      | 4.2    |
| pandas      | 1.0    |
| panel       | 0.8    |
| papermill   | 2.0    |
| param       | 1.9    |
| pip         | 20.0   |
| pyfftw      | 0.12   |
| python      | 3.8    |
| scipy       | 1.4    |
| scs         | 2.1    |
| statsmodels | 0.11   |
| tiff file   | 2020.2 |
| tqdm        | 4.43   |
| xarray      | 0.15   |
| zarr        | 2.4    |
| medpy       | 0.4    |
| simpleitk   | 1.2    |

1152 *Comparison of algorithms in related pipelines*

1153 *Table 3: List of algorithm implementations in different pipelines. For a lot of steps different*  
 1154 *algorithm implementation can be chosen by the user based on features of the data. In such*  
 1155 *cases we only list the default and most commonly used algorithms here.*

| Step                         | Minian implementation                                   | CalmAn implementation                                            | MIN1PIPE implementation                                                           | Critical parameters                            |
|------------------------------|---------------------------------------------------------|------------------------------------------------------------------|-----------------------------------------------------------------------------------|------------------------------------------------|
| Denoising                    | Median filter                                           | None                                                             | Anisotropic filter                                                                | Spatial window size of the filter              |
| Background removal           | Morphological top-hat transform                         | None                                                             | Morphological top-hat transform                                                   | Spatial window size of the top-hat transform   |
| Motion correction            | FFT-based translational motion correction               | Non-rigid patch-wise translational motion correction (NoRMCorre) | Mix of translational motion correction and Demons diffeomorphic motion correction | Different                                      |
| Initialization               | Seed-based with peak-noise-ratio and KS-test refinement | Pixel-wise correlation and peak-noise-ratio thresholding         | Seed-based with GMM, peak-noise-ratio and KS-test refinement                      | Threshold for correlation and peak-noise-ratio |
| Spatial and temporal updates | CNMF with cvxpy as deconvolution backend                | CNMF-E with oasis as deconvolution backend                       | CNMF with cvx matlab package as deconvolution                                     | Noise cut-off frequency. Expected size of      |

|  |  |  |         |                         |
|--|--|--|---------|-------------------------|
|  |  |  | backend | neurons. Sparse penalty |
|--|--|--|---------|-------------------------|

1156 *Source data*

1157 **Table 4: List of source data related to validation figures.**

| <b>Title</b>              | <b>Description</b>                                                                                              |
|---------------------------|-----------------------------------------------------------------------------------------------------------------|
| Figure 15 - source data 1 | Raw validation performance with simulated data.                                                                 |
| Figure 16 - source data 1 | Raw correlations between Minian deconvolved traces and simulated ground truth.                                  |
| Figure 16 - source data 2 | Raw example traces from Minian and simulated ground truth. Filenames indicate signal level and source of trace. |
| Figure 17 - source data 1 | Raw spatial footprint values shown in the overlay plot.                                                         |
| Figure 17 - source data 2 | Raw example traces from Minian and Caiman. Filenames indicate cell id and source of trace.                      |
| Figure 18 - source data 1 | Raw memory usage and running time with different datasets for both pipelines.                                   |
| Figure 19 - source data 1 | Raw memory usage and running time with different parallel processes for both pipelines.                         |
| Figure 20 - source data 1 | Raw correlation of spatial firing pattern with different shifts in field-of-view.                               |
| Figure 20 - source data 2 | Raw spatial firing activity for the two sessions shown.                                                         |

1158

1159 **Conflict of interest**

1160 The authors declare that they have no competing financial interests.

1161 **Funding**

1162 *NIH F32AG067640*

1163 • William Mau

1164 *NIH BRAIN Initiative (R01 EB028166)*

1165 • Kanaka Rajan

1166 *James S. McDonnell Foundation's Understanding Human Cognition Scholar Award*

1167 • Kanaka Rajan

1168 *NSF FOUNDATIONS Award (NSF1926800)*

1169 • Kanaka Rajan

1170 *CURE Epilepsy Taking Flight Award*

1171 • Tristan Shuman

1172 *American Epilepsy Society Junior investigator Award*

1173 • Tristan Shuman

1174 *R03 NS111493*

1175 • Tristan Shuman

1176 *R21 DA049568*

1177 • Tristan Shuman

1178 *R01 NS116357*

1179 • Tristan Shuman

1180 *U01 NS094286-01*

1181 • Daniel Aharoni

1182 *1700408 Neurotech Hub*

1183 • Daniel Aharoni

1184 *NIH DP2MH122399*

1185 • Denise J. Cai

1186 *R01 MH120162*

1187 • Denise J. Cai

1188 *Botanical Center Pilot Award from P50 AT008661-01 from the NCCIH and the ODS (Pasinetti PI)*

1190 • Denise J. Cai

1191 *One Mind Otsuka Rising Star Award*

1192 • Denise J. Cai

1193 *McKnight Memory and Cognitive Disorders Award*

1194 • Denise J. Cai

1195 *Klingenstein-Simons Fellowship Award in Neuroscience*

1196 • Denise J. Cai

1197 *Mount Sinai Distinguished Scholar Award*

1198 • Denise J. Cai

1199 *Brain Research Foundation Award*

1200 • Denise J. Cai

1201 *NARSAD Young Investigator Award*

1202 • Denise J. Cai

## 1203 **Acknowledgements**

1204 We thank Eftychios A Pnevmatikakis, Andrea Giovannucci, and Liam Paninski for establishing  
1205 the theoretical foundation and providing helpful insights for the pipeline. We thank Pat Gunn for  
1206 helping with benchmarking with CalmAn pipeline. We thank Taylor Francisco and Denisse  
1207 Morales-Rodriguez for helping with data analysis and revision. We thank MetaCell (Stephen  
1208 Larson, Giovanni Idili, Zoran Sinnema, Dan Knudsen, and Paolo Bazzigaluppi) for contributing  
1209 to the documentation and continuous integration of the pipeline. We thank Brandon Wei, Mimi  
1210 La-Vu, and Christopher Lee for contributing to the dataset used in Minian development and  
1211 testing. The authors acknowledge support from following funding sources: WM is supported by  
1212 NIH F32AG067640. KR is supported by NIH BRAIN Initiative (R01 EB028166), James S.  
1213 McDonnell Foundation's Understanding Human Cognition Scholar Award, and NSF

1214 FOUNDATIONS Award (NSF1926800). TS is supported by CURE Epilepsy Taking Flight  
1215 Award, American Epilepsy Society Junior investigator Award, R03 NS111493, R21 DA049568,  
1216 and R01 NS116357. DA is supported by U01 NS094286-01, and 1700408 Neurotech Hub. DJC  
1217 is supported by NIH DP2MH122399, R01 MH120162, Botanical Center Pilot Award from P50  
1218 AT008661-01 from the NCCIH and the ODS (Pasinetti PI), One Mind Otsuka Rising Star Award,  
1219 McKnight Memory and Cognitive Disorders Award, Klingenstein-Simons Fellowship Award in  
1220 Neuroscience, Mount Sinai Distinguished Scholar Award, Brain Research Foundation Award,  
1221 and NARSAD Young Investigator Award.

## 1222 **References**

### 1223 **1. The Future Is Open: Open-Source Tools for Behavioral Neuroscience Research**

1224 Samantha R. White, Linda M. Amarante, Alexxai V. Kravitz, Mark Laubach

1225 *eneuro* (2019-07) <https://doi.org/ggcmcv>

1226 DOI: 10.1523/eneuro.0223-19.2019 · PMID: 31358510 · PMCID: PMC6712209

### 1227 **2. Open source tools for large-scale neuroscience**

1228 Jeremy Freeman

1229 *Current Opinion in Neurobiology* (2015-06) <https://doi.org/ghqn37>

1230 DOI: 10.1016/j.conb.2015.04.002 · PMID: 25982977

### 1231 **3. Open source modules for tracking animal behavior and closed-loop stimulation based 1232 on Open Ephys and Bonsai**

1233 Alessio Paolo Buccino, Mikkel Elle Lepperød, Sverre-Arne Dragly, Philipp Häfliger, Marianne  
1234 Fyhn, Torkel Hafting

1235 *Journal of Neural Engineering* (2018-10-01) <https://doi.org/ggp3mh>

1236 DOI: 10.1088/1741-2552/aac45 · PMID: 29946057

### 1237 **4. An open source automated two-bottle choice test apparatus for rats**

1238 Jude A. Frie, Jibrán Y. Khokhar

1239 *HardwareX* (2019-04) <https://doi.org/ghr3cd>

1240 DOI: 10.1016/j.ohx.2019.e00061 · PMID: 31245655 · PMCID: PMC6594565

### 1241 **5. Bonsai: an event-based framework for processing and controlling data streams**

1242 Gonçalo Lopes, Niccolò Bonacchi, João Frazão, Joana P. Neto, Bassam V. Atallah, Sofia  
1243 Soares, Luísa Moreira, Sara Matias, Pavel M. Itskov, Patrícia A. Correia, ... Adam R. Kampff

1244 *Frontiers in Neuroinformatics* (2015-04-08) <https://doi.org/ggbj87>

1245 DOI: 10.3389/fninf.2015.00007 · PMID: 25904861 · PMCID: PMC4389726

### 1246 **6. Feeding Experimentation Device (FED): A flexible open-source device for measuring 1247 feeding behavior**

1248 Katrina P. Nguyen, Timothy J. O'Neal, Olurotimi A. Bolunduro, Elecia White, Alexxai V. Kravitz

1249 *Journal of Neuroscience Methods* (2016-07) <https://doi.org/f8rcmm>

1250 DOI: 10.1016/j.jneumeth.2016.04.003 · PMID: 27060385 · PMCID: PMC4884551

### 1251 **7. An open-source device for measuring food intake and operant behavior in rodent 1252 home-cages**

- 1253 Bridget A Matikainen-Ankney, Thomas Earnest, Mohamed Ali, Eric Casey, Justin G Wang, Amy  
1254 K Sutton, Alex A Legaria, Kia M Barclay, Laura B Murdaugh, Makenzie R Norris, ... Alexxai V  
1255 Kravitz  
1256 *eLife* (2021-03-29) <https://doi.org/gj6mqj>  
1257 DOI: 10.7554/elife.66173 · PMID: 33779547 · PMCID: PMC8075584
- 1258 **8. JAABA: interactive machine learning for automatic annotation of animal behavior**  
1259 Mayank Kabra, Alice A Robie, Marta Rivera-Alba, Steven Branson, Kristin Branson  
1260 *Nature Methods* (2013-01) <https://doi.org/gg66kh>  
1261 DOI: 10.1038/nmeth.2281 · PMID: 23202433
- 1262 **9. DeepLabCut: markerless pose estimation of user-defined body parts with deep**  
1263 **learning**  
1264 Alexander Mathis, Pranav Mamidanna, Kevin M. Cury, Taiga Abe, Venkatesh N. Murthy,  
1265 Mackenzie Weygandt Mathis, Matthias Bethge  
1266 *Nature Neuroscience* (2018-09) <https://doi.org/gd249k>  
1267 DOI: 10.1038/s41593-018-0209-y · PMID: 30127430
- 1268 **10. Automated classification of self-grooming in mice using open-source software**  
1269 Bastijn J. G. van den Boom, Pavlina Pavlidi, Casper J. H. Wolf, Adriana H. Mooij, Ingo Willuhn  
1270 *Journal of Neuroscience Methods* (2017-09) <https://doi.org/gb2wxk>  
1271 DOI: 10.1016/j.jneumeth.2017.05.026 · PMID: 28648717
- 1272 **11. Efficient and accurate extraction of in vivo calcium signals from microendoscopic**  
1273 **video data**  
1274 Pengcheng Zhou, Shanna L Resendez, Jose Rodriguez-Romaguera, Jessica C Jimenez, Shay  
1275 Q Neufeld, Andrea Giovannucci, Johannes Friedrich, Eftychios A Pnevmatikakis, Garret D  
1276 Stuber, Rene Hen, ... Liam Paninski  
1277 *eLife* (2018-02-22) <https://doi.org/gfxbdp>  
1278 DOI: 10.7554/elife.28728 · PMID: 29469809 · PMCID: PMC5871355
- 1279 **12. MIN1PIPE: A Miniscope 1-Photon-Based Calcium Imaging Signal Extraction Pipeline**  
1280 Jinghao Lu, Chunyuan Li, Jonnathan Singh-Alvarado, Zhe Charles Zhou, Flavio Fröhlich,  
1281 Richard Mooney, Fan Wang  
1282 *Cell Reports* (2018-06) <https://doi.org/gdpc2z>  
1283 DOI: 10.1016/j.celrep.2018.05.062 · PMID: 29925007 · PMCID: PMC6084484
- 1284 **13. Automated Analysis of Cellular Signals from Large-Scale Calcium Imaging Data**  
1285 Eran A. Mukamel, Axel Nimmerjahn, Mark J. Schnitzer  
1286 *Neuron* (2009-09) <https://doi.org/bhwqvc>  
1287 DOI: 10.1016/j.neuron.2009.08.009 · PMID: 19778505 · PMCID: PMC3282191
- 1288 **14. Suite2p: beyond 10,000 neurons with standard two-photon microscopy**  
1289 Marius Pachitariu, Carsen Stringer, Mario Dipoppa, Sylvia Schröder, L. Federico Rossi, Henry  
1290 Dalgleish, Matteo Carandini, Kenneth D. Harris  
1291 *Cold Spring Harbor Laboratory* (2017-07-20) <https://doi.org/ggdxxm>  
1292 DOI: 10.1101/061507

- 1293 **15. Fast, Simple Calcium Imaging Segmentation with Fully Convolutional Networks**  
1294 Aleksander Klibisz, Derek Rose, Matthew Eicholtz, Jay Blundon, Stanislav Zakharenko  
1295 *Lecture Notes in Computer Science* (2017) <https://doi.org/ghm58x>  
1296 DOI: 10.1007/978-3-319-67558-9\_33
- 1297 **16. CalmAn an open source tool for scalable calcium imaging data analysis**  
1298 Andrea Giovannucci, Johannes Friedrich, Pat Gunn, Jérémie Kalfon, Brandon L Brown, Sue  
1299 Ann Koay, Jiannis Taxidis, Farzaneh Najafi, Jeffrey L Gauthier, Pengcheng Zhou, ... Eftychios  
1300 A Pnevmatikakis  
1301 *eLife* (2019-01-17) <https://doi.org/gf4v82>  
1302 DOI: 10.7554/elife.38173 · PMID: 30652683 · PMCID: PMC6342523
- 1303 **17. Tracking the Same Neurons across Multiple Days in Ca<sup>2+</sup> Imaging Data**  
1304 Liron Sheintuch, Alon Rubin, Noa Brande-Eilat, Nitzan Geva, Noa Sadeh, Or Pinchasof, Yaniv  
1305 Ziv  
1306 *Cell Reports* (2017-10) <https://doi.org/ghdnqz>  
1307 DOI: 10.1016/j.celrep.2017.10.013 · PMID: 29069591 · PMCID: PMC5670033
- 1308 **18. ezTrack: An open-source video analysis pipeline for the investigation of animal**  
1309 **behavior**  
1310 Zachary T. Pennington, Zhe Dong, Yu Feng, Lauren M. Vetere, Lucia Page-Harley, Tristan  
1311 Shuman, Denise J. Cai  
1312 *Scientific Reports* (2019-12-27) <https://doi.org/ghm6dp>  
1313 DOI: 10.1038/s41598-019-56408-9 · PMID: 31882950 · PMCID: PMC6934800
- 1314 **19. Fast online deconvolution of calcium imaging data**  
1315 Johannes Friedrich, Pengcheng Zhou, Liam Paninski  
1316 *PLOS Computational Biology* (2017-03-14) <https://doi.org/f9tsn9>  
1317 DOI: 10.1371/journal.pcbi.1005423 · PMID: 28291787 · PMCID: PMC5370160
- 1318 **20. OnACID: Online Analysis of Calcium Imaging Data in Real Time\***  
1319 Andrea Giovannucci, Johannes Friedrich, Matt Kaufman, Anne Churchland, Dmitri Chklovskii,  
1320 Liam Paninski, Eftychios A. Pnevmatikakis  
1321 *Cold Spring Harbor Laboratory* (2017-10-02) <https://doi.org/ghqn38>  
1322 DOI: 10.1101/193383
- 1323 **21. Exact spike train inference via  $\ell_0$  optimization**  
1324 Sean Jewell, Daniela Witten  
1325 *The Annals of Applied Statistics* (2018-12-01) <https://doi.org/ghm589>  
1326 DOI: 10.1214/18-aos1162 · PMID: 30627301 · PMCID: PMC6322847
- 1327 **22. All the light that we can see: a new era in miniaturized microscopy**  
1328 Daniel Aharoni, Baljit S. Khakh, Alcino J. Silva, Peyman Golshani  
1329 *Nature Methods* (2019-01) <https://doi.org/ghdvnz>  
1330 DOI: 10.1038/s41592-018-0266-x · PMID: 30573833 · PMCID: PMC8320687



- 1331 **23. An open-source control system for in vivo fluorescence measurements from deep-**  
1332 **brain structures**  
1333 Scott F. Owen, Anatol C. Kreitzer  
1334 *Journal of Neuroscience Methods* (2019-01) <https://doi.org/ghvk8p>  
1335 DOI: 10.1016/j.jneumeth.2018.10.022 · PMID: 30342106 · PMCID: PMC6258340
- 1336 **24. Open Ephys: an open-source, plugin-based platform for multichannel**  
1337 **electrophysiology**  
1338 Joshua H Siegle, Aarón Cuevas López, Yogi A Patel, Kirill Abramov, Shay Ohayon, Jakob  
1339 Voigts  
1340 *Journal of Neural Engineering* (2017-08-01) <https://doi.org/gfvmzq>  
1341 DOI: 10.1088/1741-2552/aa5eea · PMID: 28169219
- 1342 **25. Open Source Tools for Temporally Controlled Rodent Behavior Suitable for**  
1343 **Electrophysiology and Optogenetic Manipulations**  
1344 Nicola Solari, Katalin Sviatkó, Tamás Laszlovszky, Panna Hegedüs, Balázs Hangya  
1345 *Frontiers in Systems Neuroscience* (2018-05-15) <https://doi.org/gdns24>  
1346 DOI: 10.3389/fnsys.2018.00018 · PMID: 29867383 · PMCID: PMC5962774
- 1347 **26. A wireless miniScope for deep brain imaging in freely moving mice**  
1348 Giovanni Barbera, Bo Liang, Lifeng Zhang, Yun Li, Da-Ting Lin  
1349 *Journal of Neuroscience Methods* (2019-07) <https://doi.org/ghtkfs>  
1350 DOI: 10.1016/j.jneumeth.2019.05.008 · PMID: 31116963 · PMCID: PMC6636826
- 1351 **27. A Compact Head-Mounted Endoscope for In Vivo Calcium Imaging in Freely Behaving**  
1352 **Mice**  
1353 Alexander D. Jacob, Adam I. Ramsaran, Andrew J. Mocle, Lina M. Tran, Chen Yan, Paul W.  
1354 Frankland, Sheena A. Josselyn  
1355 *Current Protocols in Neuroscience* (2018-07) <https://doi.org/gdr76d>  
1356 DOI: 10.1002/cpns.51 · PMID: 29944206
- 1357 **28. An open source, wireless capable miniature microscope system**  
1358 William A Liberti, L Nathan Perkins, Daniel P Leman, Timothy J Gardner  
1359 *Journal of Neural Engineering* (2017-08-01) <https://doi.org/gf73sj>  
1360 DOI: 10.1088/1741-2552/aa6806 · PMID: 28514229 · PMCID: PMC5955387
- 1361 **29. NINscope, a versatile miniscope for multi-region circuit investigations**  
1362 Andres de Groot, Bastijn JG van den Boom, Romano M van Genderen, Joris Coppens, John  
1363 van Veldhuijzen, Joop Bos, Hugo Hoedemaker, Mario Negrello, Ingo Willuhn, Chris I De Zeeuw,  
1364 Tycho M Hoogland  
1365 *eLife* (2020-01-14) <https://doi.org/ghsb8m>  
1366 DOI: 10.7554/elife.49987 · PMID: 31934857 · PMCID: PMC6989121
- 1367 **30. High-speed volumetric imaging of neuronal activity in freely moving rodents**  
1368 Oliver Skocek, Tobias Nöbauer, Lukas Weillguny, Francisca Martínez Traub, Chuying Naomi  
1369 Xia, Maxim I. Molodtsov, Abhinav Grama, Masahito Yamagata, Daniel Aharoni, David D. Cox,  
1370 ... Alipasha Vaziri

- 1371 *Nature Methods* (2018-06) <https://doi.org/gf2n7z>  
1372 DOI: 10.1038/s41592-018-0008-0 · PMID: 29736000 · PMCID: PMC7990085
- 1373 **31. Imaging Cortical Dynamics in GCaMP Transgenic Rats with a Head-Mounted**  
1374 **Widefield Macroscope**  
1375 Benjamin B. Scott, Stephan Y. Thiberge, Caiying Guo, D. Gowanlock R. Tervo, Carlos D. Brody,  
1376 Alla Y. Karpova, David W. Tank  
1377 *Neuron* (2018-12) <https://doi.org/gfgk25>  
1378 DOI: 10.1016/j.neuron.2018.09.050 · PMID: 30482694 · PMCID: PMC6283673
- 1379 **32. Miniaturized integration of a fluorescence microscope**  
1380 Kunal K Ghosh, Laurie D Burns, Eric D Cocker, Axel Nimmerjahn, Yaniv Ziv, Abbas El Gamal,  
1381 Mark J Schnitzer  
1382 *Nature Methods* (2011-10) <https://doi.org/cv75qh>  
1383 DOI: 10.1038/nmeth.1694 · PMID: 21909102 · PMCID: PMC3810311
- 1384 **33. Long-term dynamics of CA1 hippocampal place codes**  
1385 Yaniv Ziv, Laurie D Burns, Eric D Cocker, Elizabeth O Hamel, Kunal K Ghosh, Lacey J Kitch,  
1386 Abbas El Gamal, Mark J Schnitzer  
1387 *Nature Neuroscience* (2013-02-10) <https://doi.org/gdh98h>  
1388 DOI: 10.1038/nn.3329 · PMID: 23396101 · PMCID: PMC3784308
- 1389 **34. A shared neural ensemble links distinct contextual memories encoded close in time**  
1390 Denise J. Cai, Daniel Aharoni, Tristan Shuman, Justin Shobe, Jeremy Biane, Weilin Song,  
1391 Brandon Wei, Michael Veshkini, Mimi La-Vu, Jerry Lou, ... Alcino J. Silva  
1392 *Nature* (2016-06) <https://doi.org/f8pp28>  
1393 DOI: 10.1038/nature17955 · PMID: 27251287 · PMCID: PMC5063500
- 1394 **35. Breakdown of spatial coding and interneuron synchronization in epileptic mice**  
1395 Tristan Shuman, Daniel Aharoni, Denise J. Cai, Christopher R. Lee, Spyridon Chavlis, Lucia  
1396 Page-Harley, Lauren M. Vetere, Yu Feng, Chen Yi Yang, Irene Mollinedo-Gajate, ... Peyman  
1397 Golshani  
1398 *Nature Neuroscience* (2020-02) <https://doi.org/ghm6dn>  
1399 DOI: 10.1038/s41593-019-0559-0 · PMID: 31907437 · PMCID: PMC7259114
- 1400 **36. Circuit Investigations With Open-Source Miniaturized Microscopes: Past, Present and**  
1401 **Future**  
1402 Daniel Aharoni, Tycho M. Hoogland  
1403 *Frontiers in Cellular Neuroscience* (2019-04-05) <https://doi.org/ghqn39>  
1404 DOI: 10.3389/fncel.2019.00141 · PMID: 31024265 · PMCID: PMC6461004
- 1405 **37. Simultaneous Denoising, Deconvolution, and Demixing of Calcium Imaging Data**  
1406 Eftychios A. Pnevmatikakis, Daniel Soudry, Yuanjun Gao, Timothy A. Machado, Josh Merel,  
1407 David Pfau, Thomas Reardon, Yu Mu, Clay Lacefield, Weijian Yang, ... Liam Paninski  
1408 *Neuron* (2016-01) <https://doi.org/f8g23x>  
1409 DOI: 10.1016/j.neuron.2015.11.037 · PMID: 26774160 · PMCID: PMC4881387

- 1410 **38. Fast Nonnegative Deconvolution for Spike Train Inference From Population Calcium**  
1411 **Imaging**  
1412 Joshua T. Vogelstein, Adam M. Packer, Timothy A. Machado, Tanya Sippy, Baktash Babadi,  
1413 Rafael Yuste, Liam Paninski  
1414 *Journal of Neurophysiology* (2010-12) <https://doi.org/fpddqn>  
1415 DOI: 10.1152/jn.01073.2009 · PMID: 20554834 · PMCID: PMC3007657
- 1416 **39. Fast and statistically robust cell extraction from large-scale neural calcium imaging**  
1417 **datasets**  
1418 Hakan Inan, Claudia Schmuckermair, Tugce Tasci, Biafra O. Ahanonu, Oscar Hernandez,  
1419 Jérôme Lecoq, Fatih Dinç, Mark J. Wagner, Murat A. Erdogdu, Mark J. Schnitzer  
1420 *Neuroscience* (2021-03-25) <https://doi.org/gjs4d5>  
1421 DOI: 10.1101/2021.03.24.436279
- 1422 **40. Template matching techniques in computer vision: theory and practice**  
1423 Roberto Brunelli  
1424 *Wiley* (2009)  
1425 ISBN: 9780470517062
- 1426 **41. Online analysis of microendoscopic 1-photon calcium imaging data streams**  
1427 Johannes Friedrich, Andrea Giovannucci, Eftychios A. Pnevmatikakis  
1428 *PLOS Computational Biology* (2021-01-28) <https://doi.org/gp2fsj>  
1429 DOI: 10.1371/journal.pcbi.1008565 · PMID: 33507937 · PMCID: PMC7842953
- 1430 **42. Jupyter Notebooks – a publishing format for reproducible computational workflows**  
1431 Thomas Kluyver, Benjamin Ragan-Kelley, Pé, Fernando Rez, Brian Granger, Matthias  
1432 Bussonnier, Jonathan Frederic, Kyle Kelley, Jessica Hamrick, Jason Grout, ... Jupyter  
1433 Development Team  
1434 *Positioning and Power in Academic Publishing: Players, Agents and Agendas* (2016)  
1435 <https://ebooks.iospress.nl/doi/10.3233/978-1-61499-649-1-87>  
1436 DOI: 10.3233/978-1-61499-649-1-87
- 1437 **43. Array programming with NumPy**  
1438 Charles R. Harris, K. Jarrod Millman, Stéfan J. van der Walt, Ralf Gommers, Pauli Virtanen,  
1439 David Cournapeau, Eric Wieser, Julian Taylor, Sebastian Berg, Nathaniel J. Smith, ... Travis E.  
1440 Oliphant  
1441 *Nature* (2020-09-17) <https://doi.org/ghbzf2>  
1442 DOI: 10.1038/s41586-020-2649-2 · PMID: 32939066 · PMCID: PMC7759461
- 1443 **44. SciPy 1.0: fundamental algorithms for scientific computing in Python**  
1444 Pauli Virtanen, Ralf Gommers, Travis E. Oliphant, Matt Haberland, Tyler Reddy, David  
1445 Cournapeau, Evgeni Burovski, Pearu Peterson, Warren Weckesser, Jonathan Bright, ... Yoshiki  
1446 Vázquez-Baeza  
1447 *Nature Methods* (2020-03-02) <https://doi.org/ggj45f>  
1448 DOI: 10.1038/s41592-019-0686-2 · PMID: 32015543 · PMCID: PMC7056644

- 1449 **45. xarray: N-D labeled Arrays and Datasets in Python**  
1450 Stephan Hoyer, Joseph J. Hamman  
1451 *Journal of Open Research Software* (2017-04-05) <https://doi.org/gdqdmw>  
1452 DOI: 10.5334/jors.148
- 1453 **46. holoviz/holoviews: Version 1.13.3**  
1454 Philipp Rudiger, Jean-Luc Stevens, James A. Bednar, Bas Nijholt,, Andrew, Chris B, Achim  
1455 Randelhoff, Jon Mease, Vasco Tenner, Maxalbert, ... Kbowen  
1456 *Zenodo* (2020-06-23) <https://doi.org/ghm6dq>  
1457 DOI: 10.5281/zenodo.3904606
- 1458 **47. Bokeh: Python library for interactive visualization**  
1459 Bokeh Development Team  
1460 (2020) <https://bokeh.org/>
- 1461 **48. The OpenCV Library**  
1462 G. Bradski  
1463 *Dr. Dobb's Journal of Software Tools* (2000)
- 1464 **49. Dask: Library for dynamic task scheduling**  
1465 Dask Development Team  
1466 (2016) <https://dask.org>
- 1467 **50. The hippocampus as a spatial map. Preliminary evidence from unit activity in the**  
1468 **freely-moving rat**  
1469 J. O'Keefe, J. Dostrovsky  
1470 *Brain Research* (1971-11) <https://doi.org/bwdqcb>  
1471 DOI: 10.1016/0006-8993(71)90358-1
- 1472 **51. Long-term stability of the place-field activity of single units recorded from the dorsal**  
1473 **hippocampus of freely behaving rats**  
1474 L. T. Thompson, P. J. Best  
1475 *Brain Research* (1990-02) <https://doi.org/cp6bjf>  
1476 DOI: 10.1016/0006-8993(90)90555-p
- 1477 **52. Robustness of Spike Deconvolution for Neuronal Calcium Imaging**  
1478 Marius Pachitariu, Carsen Stringer, Kenneth D. Harris  
1479 *The Journal of Neuroscience* (2018-09-12) <https://doi.org/gd9mcx>  
1480 DOI: 10.1523/jneurosci.3339-17.2018 · PMID: 30082416 · PMCID: PMC6136155
- 1481 **53. Ultrasensitive fluorescent proteins for imaging neuronal activity**  
1482 Tsai-Wen Chen, Trevor J. Wardill, Yi Sun, Stefan R. Pulver, Sabine L. Renninger, Amy Baohan,  
1483 Eric R. Schreiter, Rex A. Kerr, Michael B. Orger, Vivek Jayaraman, ... Douglas S. Kim  
1484 *Nature* (2013-07) <https://doi.org/gcz68k>  
1485 DOI: 10.1038/nature12354 · PMID: 23868258 · PMCID: PMC3777791
